# Supplementary material for: Reconstruction of Marine Commercial Landings for the Brazilian Industrial and Artisanal Fisheries From 1950 to 2015
Source: Frontiers journal article supplement (doi:10.3389/fmars.2021.659110), 2021-07-27
Supplement: Table_1.XLSX [file Table_1.XLSX]

## Sheet: Species name vs Common name
Suplementar Table 1. Common names for each species.
Rótulos de Linha
Abudefduf saxatilis
Sargentinho
Viuvinha
Acanthocybium solandri
Cavala
Cavala empinge
Cavala preta
Wahoo
Acanthurus chirurgus
Caraúna
Acanthurus spp
Barbeiro
Caraúna
Cirurgião
Lanceta
Achelous spinimanus
Siri candeia
Actinopterygii
Mistura
Peixes agrupados
Aetobatus narinari
Arraia
Raia
Raia pintada
Albula spp
Peixe rato
Albula vulpes
Ubarana
Ubarana rato
Alectis ciliaris
Aracanguira
Galo do alto
Xaréu branco
Alopias spp
Cação
Cação raposa
Raposa
Tubarão raposa
Alopias superciliosus
Cação raposa
Alopias vulpinus
Cação
Cação raposa
Alphestes afer
Garaçapé
Pirapiranga
Aluterus monoceros
Peixe porco
Peroá cação
Peroá chinelo
Porco chinelo
Amphiarius phrygiatus
Canguira
Amphiarius rugispinis
Bagre
Jurupiranga
Amphichthys cryptocentrus
Pacamão
Anchoa januaria
Manjuba chata
Rabo de fogo
Anchoa spinifer
Arenga
Arenque
Mulata
Mulatinha
Pilombeta
Anchoa spp
Manjuba
Anchoa tricolor
Manjuba branca
Anchovia clupeoides
Arenga
Arenque
Manjuba
Mulata
Mulatinha
Pilombeta
Anchoviella lepidentostole
Manjuba
Manjuba de iguape
Pilombeta
Anchoviella sp
Manjuba
Pilombeta
Anguilliformes
Congro
Moréia
Anisotremus surinamensis
Pirambu
Sanhoá
Sargo
Anisotremus virginicus
Salema
Anomalocardia flexuosa
Berbigão
Chumbinho
Maçunim
Marisco
Molusco
Sarnambi
Taioba
Antimora rostrata
Antimora azul
Archosargus probatocephalus
Outros esparídeos
Sargo
Sargo de dente
Archosargus rhomboidalis
Canhanha
Outros esparídeos
Salema
Sambuio
Archosargus spp
Sambuio
Sargo
Arenaeus cribrarius
Siri pintado
Ariidae
Bagre
Gurijuba
Aristaeomorpha foliacea
Camarão moruno
Aristaeopsis edwardsiana
Camarão carabineiro
Carabinero
Aristeus antillensis
Camarão alistado
Camarão listrado
Artemesia longinaris
Camarão
Camarão barba ruça
Camarão ferrinho
Camarão sete barbas
Aspistor luniscutis
Bagre
Caçari
Aspistor quadriscutis
Bagre
Cangatá
Cangatã
Astroscopus sexspinosus
Miracéu
Astroscopus spp
Miracéu
Atherinella brasiliensis
Peixe rei
Atlantoraja castelnaui
Raia emplastro castelnaui
Atlantoraja cyclophora
Raia
Raia carimbada
Aulostomus maculatus
Trombeta
Auxis thazard
Bonito
Bonito cachorra
Bonito cachorro
Bagre bagre
Bagre
Bandeirada
Bandeirado
Sari sari
Bagre marinus
Bagre
Bagre bandeira
Bairdiella goeldi
Cará
Corvina
Miraguaia
Mirucaia
Pescada
Pirucaia
Balistes capriscus
Cangulo
Peixe porco
Peroá
Porco
Balistes spp
Cangulo
Capado
Peroá
Balistes vetula
Cangulo
Capado
Peixe porco
Peroá
Peroá preta
Bathygobius soporator
Amboré
Bathyraja schroederi
Raia ferreira
Batoidea
Arraia
Raia
Batrachoides surinamensis
Pacamão
Batrachoidiformes
Pacamão
Belonidae
Agulhão
Zambuio
Beloniformes
Agulha
Beryx splendens
Alfonsino
Bivalvia
Marisco
Moluscos não especificados
Moluscos não identificados
Outros moluscos
Brachygenys chrysargyrea
Xira
Brachyura
Caranguejo
Brevoortia pectinata
Savelha
Brevoortia spp
Savelha
Calamus penna
Peixe pena
Pena
Calamus pennatula
Pargo pena
Peixe pena
Pena
Calamus spp
Outros esparídeos
Peixe pena
Pena
Callinectes bocourti
Siri fedido
Callinectes danae
Siri
Callinectes exasperatus
Siri
Siri de mangue
Callinectes spp
Siri
Siri azul
Carangidae
Aracaroba
Canguira
Outros carangídeos
Pampo
Caranx bartholomaei
Garajuba
Guaraiuba
Guarajuba
Outros carangídeos
Xarelete
Xaréu
Caranx crysos
Carapau
Chicharro
Chumberga
Garajuba
Garassuma
Graçainha
Guaracema
Guarassuma
Guaraúba
Guaricema
Xarelete
Xaréu
Xixarro
Caranx hippos
Xarelete
Xaréu
Caranx latus
Aracimbora
Cabeçudo
Garacimbora
Garassuma
Garaximbora
Graçaim
Guaracimbora
Guarajuba
Guaraximbora
Xarelete
Xaréu
Xerelete
Caranx lugubris
Ferreiro
Pargo ferreira
Xaréu preto
Caranx spp
Xaréu
Xerelete
Carcharhinidae
Cação
Carcharhiniformes
Cação
Tubarão
Carcharhinus acronotus
Cação
Carcharhinus falciformis
Cação
Cação branco
Cação lombo preto
Carcharhinus leucas
Cação cabeça chata
Carcharhinus limbatus
Cação
Carcharhinus longimanus
Cação
Cação galha branca
Cação rajado
Carcharhinus obscurus
Cação fidalgo
Carcharhinus plumbeus
Cação
Cação barriga d´água
Cação galhudo
Carcharhinus porosus
Cação
Cação azeiteiro
Carcharhinus spp
Cação
Cação baía
Cação galha preta
Machote
Tubarão
Carcharias taurus
Cação
Cação mangona
Mangona
Cardisoma guanhumi
Caranguejo
Caranguejo (de mar)
Guaiamum
Cathorops spixii
Bagre
Bagre amarelo
Uriacica
Uricica
Cathorops spp
Bagre
Oriacica
Uriacica
Uricica
Caulolatilus chrysops
Batata da pedra
Centropomus parallelus
Robalo
Robalo peba
Robalo peva
Centropomus spp
Camboriaçu
Camorim (mar)
Camurim
Robalo
Centropomus undecimalis
Camurim
Robalo
Robalo flecha
Cephalopholis fulva
Caraúna
Catuá
Garoupa
Garoupinha
Jabu
Piraúna
Cephalopoda Teuthida
Lula
Cetengraulis edentulus
Sardinha
Sardinha boca torta
Xangó
Chaceon maritae
Caranguejo africano
Chaceon notialis
Caranguejo vermelho
Chaceon ramosae
Caranguejo real
Chaceon spp
Caranguejo
Caranguejo de profundidade
Chaetodipterus faber
Enxada
Paru
Paru 1
Paru 2
Paru branco
Parum
Sabará
Saberé
Chloroscombrus chrysurus
Garapau
Outros carangídeos
Palombeta
Pilombeta
Clupeidae
Sardinha
Clupeiformes
Savelha
Conger orbignianus
Congro
Congro negro
Congro preto
Enguia
Conger spp
Congro
Conodon nobilis
Caraqui amarelo
Coró
Coroque
Jiquiri amarelo
Juquiri
Roncador
Cookeolus japonicus
Olho de boi
Coryphaena hippurus
Dourada
Dourado
Coryphaena spp
Dourado
Crassostrea brasiliana
Ostra
Crassostrea rhizophorae
Marisco
Molusco
Ostra
Outros moluscos
Crassostrea spp
Marisco
Mexilhão
Molusco
Ostra
Cronius ruber
Siri vermelho
Crustacea
Outros crustáceos
Ctenosciaena gracilicirrhus
Fofa
Cynoponticus savanna
Congro
Corongo
Cynoscion acoupa
Pescada
Pescada amarela
Pescada amarela (selvagem)
Pescada ticupa
Pescada verdadeira
Pescada vermelha
Selvagem
Cynoscion guatucupa
Maria mole
Pescada
Pescada maria mole
Pescada olhuda
Pescadinha mole
Cynoscion jamaicensis
Calafate
Goete
Cynoscion leiarchus
Pescada
Pescada (branca, verdadeira)
Pescada branca
Pescada perna de moça
Samucanga
Cynoscion microlepidotus
Corvina
Pescada
Pescada (branca, verdadeira)
Pescada bicuda
Pescada branca
Pescada dentão
Cynoscion spp
Cassari
Pescada
Pescada do Piauí
Pescada escamuda
Cynoscion virescens
Bacamarte
Cambuçu
Corvina
Pescada
Pescada bucu
Pescada cambucu
Pescada cambuçu
Pescada real
Rabo seco
Dactylopterus volitans
Avoador
Coió
Falso voador
Peixe voador
Voador
Dasyatidae
Raia manteiga
Decapoda
Camarão cristalino
Decapterus punctatus
Garapau
Xixarro
Decapterus spp
Chicharro
Xixarro
Dermatolepis inermis
Gostosa
Diapterus auratus
Carapeba
Tinga
Diapterus rhombeus
Carapeba
Caratinga
Tinga
Diapterus spp
Carapeba
Caratinga
Tinga
Vivoca
Diplectrum spp
Aipim
Jacundá
Margarida
Michole
Michole de areia
Diplodus argenteus
Marimbá
Dipturus spp
Arraia
Raia
Raia bicuda
Dissostichus eleginoides
Merluza negra
Doryteuthis pleii
Lula
Molusco
Doryteuthis sanpaulensis
Lula
Molusco
Doryteuthis spp
Lula
Echeneidae
Rêmora
Echinometra lucunter
Ouriço
Elagatis bipinnulata
Arabaiana
Enxova
Olhete
Peixe rei
Elasmobranchii
Peixe cartilaginoso
Eledone gaucha
Polvo
Eledone massyae
Polvo
Polvo saquinho
Eledone spp
Polvo
Elops spp
Juruna
Peixe rato
Ubarana
Urubaiana
Engraulidae
Anchoveta
Arenque
Manjuba
Pilombeta
Pititinga
Sardinha
Sardinha vermelha
Engraulis anchoita
Anchoita
Anchoveta
Epinephelus adscensionis
Gato
Mero gato
Epinephelus itajara
Canapu
Merete
Mero
Epinephelus marginatus
Garoupa
Epinephelus morio
Garoupa
Garoupa de São Tomé
Epinephelus niveatus
Cherne
Epinephelus spp
Cherne
Garoupa
Etelis oculatus
Mariquita
Eucinostomus spp
Carapicu
Eugerres brasilianus
Carapeba
Carapitinga
Caratinga
Euthynnus alletteratus
Bonito
Bonito pintado
Euvola ziczac
Vieira
Exocoetidae
Peixe voador
Voador
Farfantepenaeus brasiliensis
Camarão
Camarão rosa
Farfantepenaeus paulensis
Camarão
Camarão rosa
Farfantepenaeus spp
Camarão
Camarão branco
Camarão rosa
Farfantepenaeus subtilis
Camarão
Camarão médio
Camarão rosa
Fistularia petimba
Trombeta vermelha
Fistularia tabacaria
Agulhão
Trombeta
Galeocerdo cuvier
Cação
Cação jaguara
Cação tigre
Jaguara
Tintureira
Galeorhinus galeus
Cação
Cação bico doce
Gastropoda
Búzio
Gempylidae
Peixe prego
Peixe rato
Gempylus serpens
Lanceta
Genidens barbus
Bagre
Bagre branco
Rosado
Genidens genidens
Bagre
Pararê
Genyatremus luteus
Cará
Choupa
Golosa
Peixe pedra
Sagra
Saguá
Sanhoá
Sauara
Genypterus brasiliensis
Congro
Congro rosa
Gerreidae
Cará
Carapeba
Caratinga
Geryonidae
Caranguejo
Ginglymostoma cirratum
Cação
Cação lixa
Gobioides broussonnetii
Morongo
Gobionellus oceanicus
Mirim
Miroró
Goniopsis cruentata
Aratu
Caranguejo
Caranguejo (de mar)
Guavina guavina
Amoréia
Gymnothorax spp
Amoréia
Camuru
Caramuru
Miroró
Moréia
Mororó
Gymnura altavela
Arraia
Raia
Raia borboleta
Raia emplastro
Haemulidae
Corcoroca
Sargo
Haemulon aurolineatum
Corcoroca
Roncador
Sapuruna
Xira
Haemulon melanurum
Sapuruna
Haemulon plumierii
Biquara
Corcoroca
Haemulon spp
Biquara
Cambuba
Macaço
Marcasso
Xira
Harengula clupeola
Sardinha
Sardinha cascadura
Sardinha cascuda
Helicolenus dactylopterus
Sarrão
Helicolenus spp
Sarrão
Hemicaranx amblyrhynchus
Água fria
Hemiramphus brasiliensis
Agulha
Peixe agulha
Hemiramphus spp
Agulha
Agulha preta
Agulhinha
Farnangaio
Peixe agulha
Hexanchus griseus
Cação
Cação vaca
Hirundichthys affinis
Peixe voador
Voador
Holocentrus adscensionis
Jaguareça
Jaguariça
Jaguariçá
Jagussara
Mariquita
Holothuria grisea
Pepino do mar
Hypanus spp
Arraia
Raia
Raia branca
Hyperoglyphe macrophthalma
Lírio
Hyporhamphus spp
Agulha
Agulha branca
Peixe agulha
Hyporthodus flavolimbatus
Cherne
Cherne galha amarela
Hyporthodus niveatus
Cherne
Cherne verdadeiro
Hyporthodus spp
Cherne
Garoupa
Illex argentinus
Calamar
Calamar argentino
Lula
Lula argentina
Lula saco de boi
Molusco
Isopisthus parvipinnis
Pescada
Pescadinha
Pescadinha (aratã, sete buchos)
Tortinha
Istiophoridae
Agulhão
Agulhão marinho
Marlim
Istiophorus platypterus
Agulhão
Agulhão bandeira
Agulhão de vela
Agulhão vela
Agulhão vela platypterus
Isurus oxyrinchus
Anequim
Cação
Cação anequim
Cação cavala
Cação moro
Mouka
Tubarão mako
Isurus paucus
Mestiço
Isurus spp
Anequim
Cação
Cação anequim
Kajikia albida
Agulhão
Agulhão branco
Agulhão maka
Marlin branco
Katsuwonus pelamis
Bonito
Bonito gaiado
Bonito listrado
Kyphosus spp
Pirajica
Piranjica
Kyphosus vaigiensis
Pijirica
Pirajica
Labridae
Budião
Sabonete
Lagocephalus laevigatus
Baiacu
Baiacu arara
Lamna nasus
Cação
Moka
Lampris spp
Lua
Papagaio
Larimus breviceps
Boca mole
Boca torta
Goete
Oveva
Pescada
Pescadinha
Pescadinha mole
Pirucaia
Lepidocybium flavobrunneum
Escolar
Peixe prego
Peixe rato
Prego
Lepophidium brevibarbe
Milongo
Miroró
Lile piquitinga
Pititinga
Lithodes murrayi
Caranguejo murray
Lithodes santolla
Caranguejo centolla
Caranguejo santola
Litopenaeus schmitti
Camarão
Camarão branco
Camarão grande
Camarão legítimo
Lobotes surinamensis
Acará açu
Chancarona
Croaçu
Croassu
Dorminhoco
Gereba
Prejereba
Loliginidae
Lula
Lolliguncula brevis
Lula branca
Lophius gastrophysus
Peixe rape
Peixe sapo
Sapo
Lopholatilus villarii
Batata
Batata da lama
Peixe batata
Lutjanidae
Calunga
Pargo
Vermelho
Lutjanus alexandrei
Caranha
Caranha (vermelho)
Carapitanga
Carapitinga
Pargo
Vermelha
Vermelho
Lutjanus analis
Caranha
Caraputanga
Cioba
Cirioba
Saúba
Sirioba
Vermelho
Lutjanus apodus
Baúna
Caranha
Carapitinga
Vermelho
Lutjanus buccanella
Boca negra
Vermelho
Lutjanus cyanopterus
Caranha
Vermelho
Lutjanus jocu
Dentão
Vermelho
Lutjanus purpureus
Pargo
Vermelho
Lutjanus spp
Caranha
Caranha vermelha
Caranha vermelho
Cioba
Vermelho
Lutjanus synagris
Ariacó
Ariocó
Oriacó
Vermelho
Vermelho henrique
Lutjanus vivanus
Pargo
Vermelha
Vermelho
Lycengraulis grossidens
Arenga
Arenque
Manjuba
Manjubão
Mulata
Mulatinha
Pilombeta
Macrodon ancylodon
Dentuça
Goete
Pescada
Pescada cambuçu
Pescada gó
Pescada real
Pescadinha
Pescadinha (aratã, sete buchos)
Pescadinha gó
Pescadinha real
Macrodon atricauda
Pescada
Pescada foguete
Pescada real
Pescada verdadeira
Pescadinha
Pescadinha real
Macrourus spp
Peixe prego
Macruronus novaezelandiae
Merluza de cola
Makaira nigricans
Agulhão
Agulhão azul
Agulhão negro
Marlim preto
Marlin azul
Malacanthidae
Batata
Peixe batata
Malacanthus plumieri
Bom nome
Pirá
Mammalia
Cetáceos
Masturus lanceolatus
Lua
Peixe lua
Megalops atlanticus
Camurupim
Piranema
Pirapema
Tarpão
Menippe nodifrons
Caranguejo guaia
Menticirrhus martinicensis
Betara
Papa terra
Menticirrhus spp
Batera
Betara
Curuca
Judeu
Papa terra
Papaterra
Pescada
Merluccius hubbsi
Merluza
Metanephrops rubellus
Lagostim
Pitu
Micropogonias furnieri
Cascote
Corvina
Curuca
Cururuca
Pescada
Pescada curuca
Pescada curvina
Mitsukurina owstoni
Cação espada
Mobula hypostoma
Arraia
Jamanta mirim
Raia
Mobula spp
Raia jamanta
Mollusca
Moluscos não identificados
Outros moluscos
Papa fina
Mugil brevirostris
Parati olho de fogo
Tainha
Mugil curema
Caíca
Curimã
Parati
Pratiqueira
Saúna
Tainha
Mugil curvidens
Tainha
Tainha parati
Tamatarana
Mugil incilis
Azeiteira
Tainha
Mugil liza
Cacetão
Chaveta
Curimã
Pitiú
Tainha
Mugil spp
Curimã
Pratibu
Saúna
Tainha
Tamatarana
Mullidae
Salmão
Saramonete
Trilha
Mulloidichthys martinicus
Saramonete
Mullus argentinae
Salmonete
Saramonete
Trilha
Muraena spp
Moréia
Mustelus canis
Cação
Mustelus schmitti
Cação
Cação gato
Cação gatuzo
Mustelus spp
Cação
Cação cola fina
Cação roliço
Mycteroperca acutirostris
Badejo mira
Badejo saltão
Mycteroperca bonaci
Badejo
Badejo quadrado
Serigado
Sirigado
Sirigado (badejo)
Mycteroperca interstitialis
Badejo
Mycteroperca microlepis
Badejo da areia
Mycteroperca spp
Badejo
Sirigado
Myliobatis spp
Raia
Raia morcego
Myrichthys breviceps
Miroró
Myripristis jacobus
Jaguareçá
Mariquita
Mysticeti
Baleia
Mamíferos aquáticos
Mytella guyanensis
Sururu
Mytella spp
Marisco
Mexilhão
Mexilhão do mangue
Molusco
Sururu
Mytella strigata
Marisco
Molusco
Sururu
Naucrates ductor
Peixe piloto
Nebris microps
Amor sem olho
Pescada
Pescada banana
Pescadinha
Pescadinha (aratã, sete buchos)
Nemadactylus bergi
Papa moscas
Pontudo
Notarius grandicassis
Bagre
Calafate
Cambeba
Cambeua
Notorynchus cepedianus
Cação bruxa
Octopodidae
Polvo
Octopus insularis
Polvo
Octopus spp
Molusco
Polvo
Octopus tehuelchus
Polvo
Octopus vulgaris
Molusco
Polvo
Ocyurus chrysurus
Cioba
Guaiúba
Rabo aberto
Vermelho
Odontesthes argentinensis
Peixe rei
Odontesthes spp
Peixe rei
Odontoscion dentex
Pirucaia
Oligoplites palometa
Timbira
Timbiro
Viúva
Oligoplites saliens
Guaibira
Guaivira
Salteira
Solteira
Xaveia
Oligoplites saurus
Guaivira
Guaravira
Salteira
Oligoplites spp
Guaibira
Guaivira
Salteira
Solteira
Tibiro
Timbira
Timbiro
Tombiro
Ophichthus spp
Enguia
Muçum
Ophidiidae
Congro
Congro rosa
Opisthonema oglinum
Maçambê
Maromba
Sardinha
Sardinha bandeira
Sardinha laje
Orthopristis rubra
Corcoroca
Orthopristis scapularis
Canguito
Osteichthyes
Caraoca
Carrapato
Curuba
Guacioba
Merluza
Mirim
Namorado
Outros
Outros peixes
Outros peixes não identificados
Outros peixes pelágicos não identificados
Papa figo
Papuda
Peixe batata
Pirapiranzo
Tapioca
Pagrus pagrus
Pargo
Pargo rosa
Panulirus argus
Lagosta
Lagosta verde
Lagosta vermelha
Lagostim
Panulirus laevicauda
Lagosta
Lagosta cabo verde
Lagosta verde
Lagostim
Panulirus spp
Lagosta
Paralichthyidae
Linguado
Paralichthys orbignyanus
Linguado
Linguado vermelho
Paralichthys patagonicus
Linguado
Paralichthys spp
Linguado
Linguado areia
Paralomis aculeata
Caranguejo pedra vermelha
Paralonchurus brasiliensis
Maria Luísa
Maria luíza
Tararaca
Paranisotremus moricandi
Mercador
Pareques acuminatus
Bacalhau
Pai joão
Parona signata
Parona
Peixe tábua
Solteira
Viúva negra
Pellona harroweri
Olhudo
Sardinha
Sardinha mole
Pellona spp
Sarda
Penaeidae
Camarão
Camarão estuarino
Peprilus spp
Canguiro
Gordinho
Gordinho (paru)
Mocinha
Pataca
Redondo
Percophis brasiliensis
Tira vira
Perna perna
Marisco
Mexilhão
Mexilhão da pedra
Outros moluscos
Sururu
Phacoides pectinatus
Almeja
Lambreta
Marisco
Molusco
Pinguipedidae
Namorado
Pisces
Outros peixes
Ovas
Papa figo
Peixes não identificados
Pleoticus muelleri
Camarão
Camarão santana
Plesionika edwardsii
Camarão cristalino
Pleuronectiformes
Linguado
Soia
Pogonias courbina
Borriquete
Miragaia
Miraguaia
Perumbeba
Pirambeba
Pogonias cromis
Miraguaia
Pescada
Polydactylus spp
Barbudo
Parati barbudo
Polydactylus virginicus
Barbudo
Polymixia lowei
Barbudo
Ferrinho
Polyprion americanus
Cherne
Cherne poveiro
Xerne
Pomacanthidae
Paru
Pomacanthus paru
Frade
Paru
Paru 1
Peixe frade
Saberé
Pomatomus saltatrix
Anchova
Enchova
Enxova
Porichthys porosissimus
Mamangá liso
Mangangá
Mangangá liso
Niquim
Portunidae
Siri
Portunus spinimanus
Siri candeia
Priacanthus arenatus
Cantante
Olho de boi
Olho de cão
Piranema
Priacanthus spp
Olho de cão
Piranema
Prionace glauca
Cação
Cação azul
Tubarão azul
Prionotus punctatus
Cabra
Cabrinha
Prionotus spp
Cabra
Cabrinha
Pristis pectinata
Cação espadarte
Pristis spp
Espadarte
Pseudobatos horkelii
Cação viola
Viola
Pseudobatos percellens
Arraia
Pseudobatos spp
Arraia
Cação viola
Raia
Raia viola
Viola
Pseudocaranx dentex
Vento leste
Pseudocarcharias kamoharai
Tubarão cachorro
Pseudopercis numida
Namorado
Pseudopercis spp
Namorado
Pseudupeneus maculatus
Salmonete
Saramonete
Saramunete
Pterengraulis atherinoides
Sardinha
Pteroplatytrygon violacea
Arraia
Arraia preta
Rachycentron canadum
Beijupirá
Bijupirá
Cação de escama
Parambiju
Pirambeju
Rajidae
Arraia
Emplastro
Raia
Raia emplastro
Rajiformes
Arraia
Raia
Rhinoptera spp
Arraia
Raia ticonha
Rhizoprionodon lalandii
Cação
Rhizoprionodon porosus
Cação
Rhizoprionodon spp
Cação
Cação frango
Cação rabo seco
Cação rola rola
Rhomboplites aurorubens
Cioba
Pargo
Realito
Vermelha
Vermelho
Ruvettus pretiosus
Enchova preta
Peixe prego
Rato
Sarda sarda
Bonito
Bonito serrinha
Sarda
Serra
Serrinha
Sardinella brasiliensis
Escamuda
Sardinha
Sardinha do reino
Sardinha verdadeira
Scaridae
Budião
Budião batata
Scarus trispinosus
Budião
Budião azul
Sciades couma
Bagre
Sciades herzbergii
Bagre
Sciades parkeri
Bagre
Gurijuba
Sciades proops
Bagre
Bagre guriaçu
Uritinga
Sciaenidae
Pescada
Scomber colias
Cavalinha
Muzundu
Scomberomorus brasiliensis
Peixe serra
Sarda
Sarda (serra)
Serra
Serrão
Serrinha
Sororoca
Scomberomorus cavalla
Cavala
Cavala real
Cavalinha
Scomberomorus regalis
Sarda
Serra
Scombridae
Bonito
Bonito cachorro
Scorpaena plumieri
Mamangá
Niquim
Peixe pedra
Scorpaena spp
Anequim
Mangangá
Niquim
Peixe pedra
Tinga
Scyliorhinus spp
Cação gato
Scyllarides brasiliensis
Lagosta
Lagosta sapateira
Lagostim
Sapateira
Sapateiro
Scyllarides deceptor
Lagosta
Lagosta sapateira
Scyllarides delfosi
Lagosta sapateira
Scyllarides spp
Crustáceos não identificados
Lagosta
Outros crustáceos
Selachii
Cação
Caçonete
Galha de cação
Outros tubarões
Selar crumenophthalmus
Chicharro
Garapau
Olhão
Olhudo
Xixarro
Xixarro olho de boi
Selene setapinnis
Galo sem penacho
Selene spp
Galo
Outros carangídeos
Peixe galo
Selene vomer
Galo
Galo de penacho
Peixe galo
Semirossia tenera
Lula
Molusco
Seriola dumerili
Arabaiana
Olhete
Olho de boi
Seriola fasciata
Arabaiana
Seriola lalandi
Olhete
Seriola rivoliana
Arabaiana
Seriola spp
Arabaiana
Olhete
Olho de boi
Sicyonia dorsalis
Camarão da pedra
Sparidae
Outros esparídeos
Pargo coivara
Sargo
Sparisoma axillare
Budião
Budião batata
Sparisoma frondosum
Budião
Budião batata
Sparisoma spp
Batata
Budião
Budião batata
Mirim
Peixe batata
Sphyraena barracuda
Bicuda
Pescada bicuda
Sphyraena guachancho
Bicuda
Bicudinha
Gorana
Gorona
Sphyraena spp
Barracuda
Bicuda
Bicuda
Bicudo
Pescada bicuda
Pescada goiva
Sphyraena tome
Barracuda
Bicuda
Sphyrna lewini
Cação
Cação martelo
Sphyrna mokarran
Cação
Sphyrna spp
Cação
Cação martelo
Cação panã
Cambeba
Cambeva
Tubarão
Tubarão martelo
Sphyrna tiburo
Cação
Squalus spp
Cação
Cação bagre
Squatina spp
Anjo
Cação
Cação anjo
Squatinidae
Anjo
Squilla brasiliensis
Tamburutaca
Stellifer spp
Cabeça dura
Cabeçudo
Cangoá
Canguá
Pescada
Stephanolepis hispida
Porco peludo
Stomatopoda
Tamburutaca
Stramonita haemastoma
Saquaritá
Strombus spp
Pregoaí
Strongylura marina
Agulha
Agulhão
Syacium spp
Linguado areia
Synodus spp
Lagarto
Tagelus plebeius
Molusco
Outros moluscos
Unha de velho
Testudines
Quelônios
Tartaruga
Tartaruga (de mar)
Tetraodontidae
Baiacu
Tetraodontiformes
Baiacu
Tetrapturus pfluegeri
Agulhão verde
Teuthida
Lula
Thalassophryne spp
Niquim
Thunnus alalunga
Albacora
Albacora (atum)
Albacora branca
Atum
Voador
Thunnus albacares
Albacora
Albacora (atum)
Albacora de laje
Albacora lage
Albacora laje
Atum
Vaquara
Thunnus atlanticus
Albacora
Albacorinha
Atum
Atum atlântico
Thunnus obesus
Albacora
Albacora (atum)
Albacora bandolim
Atum
Thunnus spp
Albacora
Atum
Thunnus thynnus
Albacora azul
Atum azul
Atum legítimo
Atum verdadeiro
Thyrsites lepidopodea
Cavalinha do norte
Lanceta
Trachinotus carolinus
Pampo
Trachinotus falcatus
Garabebeu
Rombudo
Sernambiguara
Trachinotus goodei
Aracanguira
Pampo galhudo
Trachinotus marginatus
Pampo malhado
Trachinotus spp
Canguira
Pampo
Samenduara
Trachurus lathami
Chicharro
Xixarro
Trichiurus lepturus
Catana
Espada
Guaravira
Peixe espada
Ucides cordatus
Caranguejo
Caranguejo (água doce)
Caranguejo (de água doce)
Caranguejo (de mar)
Caranguejo uçá
Umbrina canosai
Castanha
Umbrina coroides
Castanha
Umbrina spp
Castanha
Uraspis secunda
Sabão
Urophycis brasiliensis
Abrótea
Abrótea verdadeira
Urophycis cirrata
Abrótea
Abrótea de profundidade
Urophycis mystacea
Abrótea
Abrótea de fundo
Urophycis spp
Abrótea
Volutidae
Caramujo
Concha
Miolo de caracol
Xiphias gladius
Cação espadarte
Espadarte
Meca
Meka
Xiphopenaeus kroyeri
Camarão
Camarão pequeno
Camarão piticaia
Camarão sete barbas
Zenopsis conchifer
Galo de profundidade
Zidona dufresnei
Chave
Total Geral

## Sheet: Common name vs Species name
Suplementar Table 2. Species by common name.
Rótulos de Linha
Abrótea
Urophycis brasiliensis
Urophycis cirrata
Urophycis mystacea
Urophycis spp
Abrótea de fundo
Urophycis mystacea
Abrótea de profundidade
Urophycis cirrata
Abrótea verdadeira
Urophycis brasiliensis
Acará açu
Lobotes surinamensis
Água fria
Hemicaranx amblyrhynchus
Agulha
Beloniformes
Hemiramphus brasiliensis
Hemiramphus spp
Hyporhamphus spp
Strongylura marina
Agulha branca
Hyporhamphus spp
Agulha preta
Hemiramphus spp
Agulhão
Belonidae
Fistularia tabacaria
Istiophoridae
Istiophorus platypterus
Kajikia albida
Makaira nigricans
Strongylura marina
Agulhão azul
Makaira nigricans
Agulhão bandeira
Istiophorus platypterus
Agulhão branco
Kajikia albida
Agulhão de vela
Istiophorus platypterus
Agulhão maka
Kajikia albida
Agulhão marinho
Istiophoridae
Agulhão negro
Makaira nigricans
Agulhão vela
Istiophorus platypterus
Agulhão vela platypterus
Istiophorus platypterus
Agulhão verde
Tetrapturus pfluegeri
Agulhinha
Hemiramphus spp
Aipim
Diplectrum spp
Albacora
Thunnus alalunga
Thunnus albacares
Thunnus atlanticus
Thunnus obesus
Thunnus spp
Albacora (atum)
Thunnus alalunga
Thunnus albacares
Thunnus obesus
Albacora azul
Thunnus thynnus
Albacora bandolim
Thunnus obesus
Albacora branca
Thunnus alalunga
Albacora de laje
Thunnus albacares
Albacora lage
Thunnus albacares
Albacora laje
Thunnus albacares
Albacorinha
Thunnus atlanticus
Alfonsino
Beryx splendens
Almeja
Phacoides pectinatus
Amboré
Bathygobius soporator
Amor sem olho
Nebris microps
Amoréia
Guavina guavina
Gymnothorax spp
Anchoita
Engraulis anchoita
Anchova
Pomatomus saltatrix
Anchoveta
Engraulidae
Engraulis anchoita
Anequim
Isurus oxyrinchus
Isurus spp
Scorpaena spp
Anjo
Squatina spp
Squatinidae
Antimora azul
Antimora rostrata
Arabaiana
Elagatis bipinnulata
Seriola dumerili
Seriola fasciata
Seriola rivoliana
Seriola spp
Aracanguira
Alectis ciliaris
Trachinotus goodei
Aracaroba
Carangidae
Aracimbora
Caranx latus
Aratu
Goniopsis cruentata
Arenga
Anchoa spinifer
Anchovia clupeoides
Lycengraulis grossidens
Arenque
Anchoa spinifer
Anchovia clupeoides
Engraulidae
Lycengraulis grossidens
Ariacó
Lutjanus synagris
Ariocó
Lutjanus synagris
Arraia
Aetobatus narinari
Batoidea
Dipturus spp
Gymnura altavela
Hypanus spp
Mobula hypostoma
Pseudobatos percellens
Pseudobatos spp
Pteroplatytrygon violacea
Rajidae
Rajiformes
Rhinoptera spp
Arraia preta
Pteroplatytrygon violacea
Atum
Thunnus alalunga
Thunnus albacares
Thunnus atlanticus
Thunnus obesus
Thunnus spp
Atum atlântico
Thunnus atlanticus
Atum azul
Thunnus thynnus
Atum legítimo
Thunnus thynnus
Atum verdadeiro
Thunnus thynnus
Avoador
Dactylopterus volitans
Azeiteira
Mugil incilis
Bacalhau
Pareques acuminatus
Bacamarte
Cynoscion virescens
Badejo
Mycteroperca bonaci
Mycteroperca interstitialis
Mycteroperca spp
Badejo da areia
Mycteroperca microlepis
Badejo mira
Mycteroperca acutirostris
Badejo quadrado
Mycteroperca bonaci
Badejo saltão
Mycteroperca acutirostris
Bagre
Amphiarius rugispinis
Ariidae
Aspistor luniscutis
Aspistor quadriscutis
Bagre bagre
Bagre marinus
Cathorops spixii
Cathorops spp
Genidens barbus
Genidens genidens
Notarius grandicassis
Sciades couma
Sciades herzbergii
Sciades parkeri
Sciades proops
Bagre amarelo
Cathorops spixii
Bagre bandeira
Bagre marinus
Bagre branco
Genidens barbus
Bagre guriaçu
Sciades proops
Baiacu
Lagocephalus laevigatus
Tetraodontidae
Tetraodontiformes
Baiacu arara
Lagocephalus laevigatus
Baleia
Mysticeti
Bandeirada
Bagre bagre
Bandeirado
Bagre bagre
Barbeiro
Acanthurus spp
Barbudo
Polydactylus spp
Polydactylus virginicus
Polymixia lowei
Barracuda
Sphyraena spp
Sphyraena tome
Batata
Lopholatilus villarii
Malacanthidae
Sparisoma spp
Batata da lama
Lopholatilus villarii
Batata da pedra
Caulolatilus chrysops
Batera
Menticirrhus spp
Baúna
Lutjanus apodus
Beijupirá
Rachycentron canadum
Berbigão
Anomalocardia flexuosa
Betara
Menticirrhus martinicensis
Menticirrhus spp
Bicuda
Sphyraena barracuda
Sphyraena guachancho
Sphyraena spp
Sphyraena tome
Bicuda
Sphyraena spp
Bicudinha
Sphyraena guachancho
Bicudo
Sphyraena spp
Bijupirá
Rachycentron canadum
Biquara
Haemulon plumierii
Haemulon spp
Boca mole
Larimus breviceps
Boca negra
Lutjanus buccanella
Boca torta
Larimus breviceps
Bom nome
Malacanthus plumieri
Bonito
Auxis thazard
Euthynnus alletteratus
Katsuwonus pelamis
Sarda sarda
Scombridae
Bonito cachorra
Auxis thazard
Bonito cachorro
Auxis thazard
Scombridae
Bonito gaiado
Katsuwonus pelamis
Bonito listrado
Katsuwonus pelamis
Bonito pintado
Euthynnus alletteratus
Bonito serrinha
Sarda sarda
Borriquete
Pogonias courbina
Budião
Labridae
Scaridae
Scarus trispinosus
Sparisoma axillare
Sparisoma frondosum
Sparisoma spp
Budião azul
Scarus trispinosus
Budião batata
Scaridae
Sparisoma axillare
Sparisoma frondosum
Sparisoma spp
Búzio
Gastropoda
Cabeça dura
Stellifer spp
Cabeçudo
Caranx latus
Stellifer spp
Cabra
Prionotus punctatus
Prionotus spp
Cabrinha
Prionotus punctatus
Prionotus spp
Cação
Alopias spp
Alopias vulpinus
Carcharhinidae
Carcharhiniformes
Carcharhinus acronotus
Carcharhinus falciformis
Carcharhinus limbatus
Carcharhinus longimanus
Carcharhinus plumbeus
Carcharhinus porosus
Carcharhinus spp
Carcharias taurus
Galeocerdo cuvier
Galeorhinus galeus
Ginglymostoma cirratum
Hexanchus griseus
Isurus oxyrinchus
Isurus spp
Lamna nasus
Mustelus canis
Mustelus schmitti
Mustelus spp
Prionace glauca
Rhizoprionodon lalandii
Rhizoprionodon porosus
Rhizoprionodon spp
Selachii
Sphyrna lewini
Sphyrna mokarran
Sphyrna spp
Sphyrna tiburo
Squalus spp
Squatina spp
Cação anequim
Isurus oxyrinchus
Isurus spp
Cação anjo
Squatina spp
Cação azeiteiro
Carcharhinus porosus
Cação azul
Prionace glauca
Cação bagre
Squalus spp
Cação baía
Carcharhinus spp
Cação barriga d´água
Carcharhinus plumbeus
Cação bico doce
Galeorhinus galeus
Cação branco
Carcharhinus falciformis
Cação bruxa
Notorynchus cepedianus
Cação cabeça chata
Carcharhinus leucas
Cação cavala
Isurus oxyrinchus
Cação cola fina
Mustelus spp
Cação de escama
Rachycentron canadum
Cação espada
Mitsukurina owstoni
Cação espadarte
Pristis pectinata
Xiphias gladius
Cação fidalgo
Carcharhinus obscurus
Cação frango
Rhizoprionodon spp
Cação galha branca
Carcharhinus longimanus
Cação galha preta
Carcharhinus spp
Cação galhudo
Carcharhinus plumbeus
Cação gato
Mustelus schmitti
Scyliorhinus spp
Cação gatuzo
Mustelus schmitti
Cação jaguara
Galeocerdo cuvier
Cação lixa
Ginglymostoma cirratum
Cação lombo preto
Carcharhinus falciformis
Cação mangona
Carcharias taurus
Cação martelo
Sphyrna lewini
Sphyrna spp
Cação moro
Isurus oxyrinchus
Cação panã
Sphyrna spp
Cação rabo seco
Rhizoprionodon spp
Cação rajado
Carcharhinus longimanus
Cação raposa
Alopias spp
Alopias superciliosus
Alopias vulpinus
Cação rola rola
Rhizoprionodon spp
Cação roliço
Mustelus spp
Cação tigre
Galeocerdo cuvier
Cação vaca
Hexanchus griseus
Cação viola
Pseudobatos horkelii
Pseudobatos spp
Caçari
Aspistor luniscutis
Cacetão
Mugil liza
Caçonete
Selachii
Caíca
Mugil curema
Calafate
Cynoscion jamaicensis
Notarius grandicassis
Calamar
Illex argentinus
Calamar argentino
Illex argentinus
Calunga
Lutjanidae
Camarão
Artemesia longinaris
Farfantepenaeus brasiliensis
Farfantepenaeus paulensis
Farfantepenaeus spp
Farfantepenaeus subtilis
Litopenaeus schmitti
Penaeidae
Pleoticus muelleri
Xiphopenaeus kroyeri
Camarão alistado
Aristeus antillensis
Camarão barba ruça
Artemesia longinaris
Camarão branco
Farfantepenaeus spp
Litopenaeus schmitti
Camarão carabineiro
Aristaeopsis edwardsiana
Camarão cristalino
Decapoda
Plesionika edwardsii
Camarão da pedra
Sicyonia dorsalis
Camarão estuarino
Penaeidae
Camarão ferrinho
Artemesia longinaris
Camarão grande
Litopenaeus schmitti
Camarão legítimo
Litopenaeus schmitti
Camarão listrado
Aristeus antillensis
Camarão médio
Farfantepenaeus subtilis
Camarão moruno
Aristaeomorpha foliacea
Camarão pequeno
Xiphopenaeus kroyeri
Camarão piticaia
Xiphopenaeus kroyeri
Camarão rosa
Farfantepenaeus brasiliensis
Farfantepenaeus paulensis
Farfantepenaeus spp
Farfantepenaeus subtilis
Camarão santana
Pleoticus muelleri
Camarão sete barbas
Artemesia longinaris
Xiphopenaeus kroyeri
Cambeba
Notarius grandicassis
Sphyrna spp
Cambeua
Notarius grandicassis
Cambeva
Sphyrna spp
Camboriaçu
Centropomus spp
Cambuba
Haemulon spp
Cambuçu
Cynoscion virescens
Camorim (mar)
Centropomus spp
Camurim
Centropomus spp
Centropomus undecimalis
Camuru
Gymnothorax spp
Camurupim
Megalops atlanticus
Canapu
Epinephelus itajara
Cangatá
Aspistor quadriscutis
Cangatã
Aspistor quadriscutis
Cangoá
Stellifer spp
Canguá
Stellifer spp
Canguira
Amphiarius phrygiatus
Carangidae
Trachinotus spp
Canguiro
Peprilus spp
Canguito
Orthopristis scapularis
Cangulo
Balistes capriscus
Balistes spp
Balistes vetula
Canhanha
Archosargus rhomboidalis
Cantante
Priacanthus arenatus
Capado
Balistes spp
Balistes vetula
Cará
Bairdiella goeldi
Genyatremus luteus
Gerreidae
Carabinero
Aristaeopsis edwardsiana
Caramujo
Volutidae
Caramuru
Gymnothorax spp
Caranguejo
Brachyura
Cardisoma guanhumi
Chaceon spp
Geryonidae
Goniopsis cruentata
Ucides cordatus
Caranguejo (água doce)
Ucides cordatus
Caranguejo (de água doce)
Ucides cordatus
Caranguejo (de mar)
Cardisoma guanhumi
Goniopsis cruentata
Ucides cordatus
Caranguejo africano
Chaceon maritae
Caranguejo centolla
Lithodes santolla
Caranguejo de profundidade
Chaceon spp
Caranguejo guaia
Menippe nodifrons
Caranguejo murray
Lithodes murrayi
Caranguejo pedra vermelha
Paralomis aculeata
Caranguejo real
Chaceon ramosae
Caranguejo santola
Lithodes santolla
Caranguejo uçá
Ucides cordatus
Caranguejo vermelho
Chaceon notialis
Caranha
Lutjanus alexandrei
Lutjanus analis
Lutjanus apodus
Lutjanus cyanopterus
Lutjanus spp
Caranha (vermelho)
Lutjanus alexandrei
Caranha vermelha
Lutjanus spp
Caranha vermelho
Lutjanus spp
Caraoca
Osteichthyes
Carapau
Caranx crysos
Carapeba
Diapterus auratus
Diapterus rhombeus
Diapterus spp
Eugerres brasilianus
Gerreidae
Carapicu
Eucinostomus spp
Carapitanga
Lutjanus alexandrei
Carapitinga
Eugerres brasilianus
Lutjanus alexandrei
Lutjanus apodus
Caraputanga
Lutjanus analis
Caraqui amarelo
Conodon nobilis
Caratinga
Diapterus rhombeus
Diapterus spp
Eugerres brasilianus
Gerreidae
Caraúna
Acanthurus chirurgus
Acanthurus spp
Cephalopholis fulva
Carrapato
Osteichthyes
Cascote
Micropogonias furnieri
Cassari
Cynoscion spp
Castanha
Umbrina canosai
Umbrina coroides
Umbrina spp
Catana
Trichiurus lepturus
Catuá
Cephalopholis fulva
Cavala
Acanthocybium solandri
Scomberomorus cavalla
Cavala empinge
Acanthocybium solandri
Cavala preta
Acanthocybium solandri
Cavala real
Scomberomorus cavalla
Cavalinha
Scomber colias
Scomberomorus cavalla
Cavalinha do norte
Thyrsites lepidopodea
Cetáceos
Mammalia
Chancarona
Lobotes surinamensis
Chave
Zidona dufresnei
Chaveta
Mugil liza
Cherne
Epinephelus niveatus
Epinephelus spp
Hyporthodus flavolimbatus
Hyporthodus niveatus
Hyporthodus spp
Polyprion americanus
Cherne galha amarela
Hyporthodus flavolimbatus
Cherne poveiro
Polyprion americanus
Cherne verdadeiro
Hyporthodus niveatus
Chicharro
Caranx crysos
Decapterus spp
Selar crumenophthalmus
Trachurus lathami
Choupa
Genyatremus luteus
Chumberga
Caranx crysos
Chumbinho
Anomalocardia flexuosa
Cioba
Lutjanus analis
Lutjanus spp
Ocyurus chrysurus
Rhomboplites aurorubens
Cirioba
Lutjanus analis
Cirurgião
Acanthurus spp
Coió
Dactylopterus volitans
Concha
Volutidae
Congro
Anguilliformes
Conger orbignianus
Conger spp
Cynoponticus savanna
Genypterus brasiliensis
Ophidiidae
Congro negro
Conger orbignianus
Congro preto
Conger orbignianus
Congro rosa
Genypterus brasiliensis
Ophidiidae
Corcoroca
Haemulidae
Haemulon aurolineatum
Haemulon plumierii
Orthopristis rubra
Coró
Conodon nobilis
Corongo
Cynoponticus savanna
Coroque
Conodon nobilis
Corvina
Bairdiella goeldi
Cynoscion microlepidotus
Cynoscion virescens
Micropogonias furnieri
Croaçu
Lobotes surinamensis
Croassu
Lobotes surinamensis
Crustáceos não identificados
Scyllarides spp
Curimã
Mugil curema
Mugil liza
Mugil spp
Curuba
Osteichthyes
Curuca
Menticirrhus spp
Micropogonias furnieri
Cururuca
Micropogonias furnieri
Dentão
Lutjanus jocu
Dentuça
Macrodon ancylodon
Dorminhoco
Lobotes surinamensis
Dourada
Coryphaena hippurus
Dourado
Coryphaena hippurus
Coryphaena spp
Emplastro
Rajidae
Enchova
Pomatomus saltatrix
Enchova preta
Ruvettus pretiosus
Enguia
Conger orbignianus
Ophichthus spp
Enxada
Chaetodipterus faber
Enxova
Elagatis bipinnulata
Pomatomus saltatrix
Escamuda
Sardinella brasiliensis
Escolar
Lepidocybium flavobrunneum
Espada
Trichiurus lepturus
Espadarte
Pristis spp
Xiphias gladius
Falso voador
Dactylopterus volitans
Farnangaio
Hemiramphus spp
Ferreiro
Caranx lugubris
Ferrinho
Polymixia lowei
Fofa
Ctenosciaena gracilicirrhus
Frade
Pomacanthus paru
Galha de cação
Selachii
Galo
Selene spp
Selene vomer
Galo de penacho
Selene vomer
Galo de profundidade
Zenopsis conchifer
Galo do alto
Alectis ciliaris
Galo sem penacho
Selene setapinnis
Garabebeu
Trachinotus falcatus
Garaçapé
Alphestes afer
Garacimbora
Caranx latus
Garajuba
Caranx bartholomaei
Caranx crysos
Garapau
Chloroscombrus chrysurus
Decapterus punctatus
Selar crumenophthalmus
Garassuma
Caranx crysos
Caranx latus
Garaximbora
Caranx latus
Garoupa
Cephalopholis fulva
Epinephelus marginatus
Epinephelus morio
Epinephelus spp
Hyporthodus spp
Garoupa de São Tomé
Epinephelus morio
Garoupinha
Cephalopholis fulva
Gato
Epinephelus adscensionis
Gereba
Lobotes surinamensis
Goete
Cynoscion jamaicensis
Larimus breviceps
Macrodon ancylodon
Golosa
Genyatremus luteus
Gorana
Sphyraena guachancho
Gordinho
Peprilus spp
Gordinho (paru)
Peprilus spp
Gorona
Sphyraena guachancho
Gostosa
Dermatolepis inermis
Graçaim
Caranx latus
Graçainha
Caranx crysos
Guacioba
Osteichthyes
Guaiamum
Cardisoma guanhumi
Guaibira
Oligoplites saliens
Oligoplites spp
Guaiúba
Ocyurus chrysurus
Guaivira
Oligoplites saliens
Oligoplites saurus
Oligoplites spp
Guaracema
Caranx crysos
Guaracimbora
Caranx latus
Guaraiuba
Caranx bartholomaei
Guarajuba
Caranx bartholomaei
Caranx latus
Guarassuma
Caranx crysos
Guaraúba
Caranx crysos
Guaravira
Oligoplites saurus
Trichiurus lepturus
Guaraximbora
Caranx latus
Guaricema
Caranx crysos
Gurijuba
Ariidae
Sciades parkeri
Jabu
Cephalopholis fulva
Jacundá
Diplectrum spp
Jaguara
Galeocerdo cuvier
Jaguareça
Holocentrus adscensionis
Jaguareçá
Myripristis jacobus
Jaguariça
Holocentrus adscensionis
Jaguariçá
Holocentrus adscensionis
Jagussara
Holocentrus adscensionis
Jamanta mirim
Mobula hypostoma
Jiquiri amarelo
Conodon nobilis
Judeu
Menticirrhus spp
Juquiri
Conodon nobilis
Juruna
Elops spp
Jurupiranga
Amphiarius rugispinis
Lagarto
Synodus spp
Lagosta
Panulirus argus
Panulirus laevicauda
Panulirus spp
Scyllarides brasiliensis
Scyllarides deceptor
Scyllarides spp
Lagosta cabo verde
Panulirus laevicauda
Lagosta sapateira
Scyllarides brasiliensis
Scyllarides deceptor
Scyllarides delfosi
Lagosta verde
Panulirus argus
Panulirus laevicauda
Lagosta vermelha
Panulirus argus
Lagostim
Metanephrops rubellus
Panulirus argus
Panulirus laevicauda
Scyllarides brasiliensis
Lambreta
Phacoides pectinatus
Lanceta
Acanthurus spp
Gempylus serpens
Thyrsites lepidopodea
Linguado
Paralichthyidae
Paralichthys orbignyanus
Paralichthys patagonicus
Paralichthys spp
Pleuronectiformes
Linguado areia
Paralichthys spp
Syacium spp
Linguado vermelho
Paralichthys orbignyanus
Lírio
Hyperoglyphe macrophthalma
Lua
Lampris spp
Masturus lanceolatus
Lula
Cephalopoda Teuthida
Doryteuthis pleii
Doryteuthis sanpaulensis
Doryteuthis spp
Illex argentinus
Loliginidae
Semirossia tenera
Teuthida
Lula argentina
Illex argentinus
Lula branca
Lolliguncula brevis
Lula saco de boi
Illex argentinus
Macaço
Haemulon spp
Maçambê
Opisthonema oglinum
Machote
Carcharhinus spp
Maçunim
Anomalocardia flexuosa
Mamangá
Scorpaena plumieri
Mamangá liso
Porichthys porosissimus
Mamíferos aquáticos
Mysticeti
Mangangá
Porichthys porosissimus
Scorpaena spp
Mangangá liso
Porichthys porosissimus
Mangona
Carcharias taurus
Manjuba
Anchoa spp
Anchovia clupeoides
Anchoviella lepidentostole
Anchoviella sp
Engraulidae
Lycengraulis grossidens
Manjuba branca
Anchoa tricolor
Manjuba chata
Anchoa januaria
Manjuba de iguape
Anchoviella lepidentostole
Manjubão
Lycengraulis grossidens
Marcasso
Haemulon spp
Margarida
Diplectrum spp
Maria Luísa
Paralonchurus brasiliensis
Maria luíza
Paralonchurus brasiliensis
Maria mole
Cynoscion guatucupa
Marimbá
Diplodus argenteus
Mariquita
Etelis oculatus
Holocentrus adscensionis
Myripristis jacobus
Marisco
Anomalocardia flexuosa
Bivalvia
Crassostrea rhizophorae
Crassostrea spp
Mytella spp
Mytella strigata
Perna perna
Phacoides pectinatus
Marlim
Istiophoridae
Marlim preto
Makaira nigricans
Marlin azul
Makaira nigricans
Marlin branco
Kajikia albida
Maromba
Opisthonema oglinum
Meca
Xiphias gladius
Meka
Xiphias gladius
Mercador
Paranisotremus moricandi
Merete
Epinephelus itajara
Merluza
Merluccius hubbsi
Osteichthyes
Merluza de cola
Macruronus novaezelandiae
Merluza negra
Dissostichus eleginoides
Mero
Epinephelus itajara
Mero gato
Epinephelus adscensionis
Mestiço
Isurus paucus
Mexilhão
Crassostrea spp
Mytella spp
Perna perna
Mexilhão da pedra
Perna perna
Mexilhão do mangue
Mytella spp
Michole
Diplectrum spp
Michole de areia
Diplectrum spp
Milongo
Lepophidium brevibarbe
Miolo de caracol
Volutidae
Miracéu
Astroscopus sexspinosus
Astroscopus spp
Miragaia
Pogonias courbina
Miraguaia
Bairdiella goeldi
Pogonias courbina
Pogonias cromis
Mirim
Gobionellus oceanicus
Osteichthyes
Sparisoma spp
Miroró
Gobionellus oceanicus
Gymnothorax spp
Lepophidium brevibarbe
Myrichthys breviceps
Mirucaia
Bairdiella goeldi
Mistura
Actinopterygii
Mocinha
Peprilus spp
Moka
Lamna nasus
Molusco
Anomalocardia flexuosa
Crassostrea rhizophorae
Crassostrea spp
Doryteuthis pleii
Doryteuthis sanpaulensis
Illex argentinus
Mytella spp
Mytella strigata
Octopus spp
Octopus vulgaris
Phacoides pectinatus
Semirossia tenera
Tagelus plebeius
Moluscos não especificados
Bivalvia
Moluscos não identificados
Bivalvia
Mollusca
Moréia
Anguilliformes
Gymnothorax spp
Muraena spp
Morongo
Gobioides broussonnetii
Mororó
Gymnothorax spp
Mouka
Isurus oxyrinchus
Muçum
Ophichthus spp
Mulata
Anchoa spinifer
Anchovia clupeoides
Lycengraulis grossidens
Mulatinha
Anchoa spinifer
Anchovia clupeoides
Lycengraulis grossidens
Muzundu
Scomber colias
Namorado
Osteichthyes
Pinguipedidae
Pseudopercis numida
Pseudopercis spp
Niquim
Porichthys porosissimus
Scorpaena plumieri
Scorpaena spp
Thalassophryne spp
Olhão
Selar crumenophthalmus
Olhete
Elagatis bipinnulata
Seriola dumerili
Seriola lalandi
Seriola spp
Olho de boi
Cookeolus japonicus
Priacanthus arenatus
Seriola dumerili
Seriola spp
Olho de cão
Priacanthus arenatus
Priacanthus spp
Olhudo
Pellona harroweri
Olhudo
Selar crumenophthalmus
Oriacica
Cathorops spp
Oriacó
Lutjanus synagris
Ostra
Crassostrea brasiliana
Crassostrea rhizophorae
Crassostrea spp
Ouriço
Echinometra lucunter
Outros
Osteichthyes
Outros carangídeos
Carangidae
Caranx bartholomaei
Chloroscombrus chrysurus
Selene spp
Outros crustáceos
Crustacea
Scyllarides spp
Outros esparídeos
Archosargus probatocephalus
Archosargus rhomboidalis
Calamus spp
Sparidae
Outros moluscos
Bivalvia
Crassostrea rhizophorae
Mollusca
Perna perna
Tagelus plebeius
Outros peixes
Osteichthyes
Pisces
Outros peixes não identificados
Osteichthyes
Outros peixes pelágicos não identificados
Osteichthyes
Outros tubarões
Selachii
Ovas
Pisces
Oveva
Larimus breviceps
Pacamão
Amphichthys cryptocentrus
Batrachoides surinamensis
Batrachoidiformes
Pai joão
Pareques acuminatus
Palombeta
Chloroscombrus chrysurus
Pampo
Carangidae
Trachinotus carolinus
Trachinotus spp
Pampo galhudo
Trachinotus goodei
Pampo malhado
Trachinotus marginatus
Papa figo
Osteichthyes
Pisces
Papa fina
Mollusca
Papa moscas
Nemadactylus bergi
Papa terra
Menticirrhus martinicensis
Menticirrhus spp
Papagaio
Lampris spp
Papaterra
Menticirrhus spp
Papuda
Osteichthyes
Parambiju
Rachycentron canadum
Pararê
Genidens genidens
Parati
Mugil curema
Parati barbudo
Polydactylus spp
Parati olho de fogo
Mugil brevirostris
Pargo
Lutjanidae
Lutjanus alexandrei
Lutjanus purpureus
Lutjanus vivanus
Pagrus pagrus
Rhomboplites aurorubens
Pargo coivara
Sparidae
Pargo ferreira
Caranx lugubris
Pargo pena
Calamus pennatula
Pargo rosa
Pagrus pagrus
Parona
Parona signata
Paru
Chaetodipterus faber
Pomacanthidae
Pomacanthus paru
Paru 1
Chaetodipterus faber
Pomacanthus paru
Paru 2
Chaetodipterus faber
Paru branco
Chaetodipterus faber
Parum
Chaetodipterus faber
Pataca
Peprilus spp
Peixe agulha
Hemiramphus brasiliensis
Hemiramphus spp
Hyporhamphus spp
Peixe batata
Lopholatilus villarii
Malacanthidae
Osteichthyes
Sparisoma spp
Peixe cartilaginoso
Elasmobranchii
Peixe espada
Trichiurus lepturus
Peixe frade
Pomacanthus paru
Peixe galo
Selene spp
Selene vomer
Peixe lua
Masturus lanceolatus
Peixe pedra
Genyatremus luteus
Scorpaena plumieri
Scorpaena spp
Peixe pena
Calamus penna
Calamus pennatula
Calamus spp
Peixe piloto
Naucrates ductor
Peixe porco
Aluterus monoceros
Balistes capriscus
Balistes vetula
Peixe prego
Gempylidae
Lepidocybium flavobrunneum
Macrourus spp
Ruvettus pretiosus
Peixe rape
Lophius gastrophysus
Peixe rato
Albula spp
Elops spp
Gempylidae
Lepidocybium flavobrunneum
Peixe rei
Atherinella brasiliensis
Elagatis bipinnulata
Odontesthes argentinensis
Odontesthes spp
Peixe sapo
Lophius gastrophysus
Peixe serra
Scomberomorus brasiliensis
Peixe tábua
Parona signata
Peixe voador
Dactylopterus volitans
Exocoetidae
Hirundichthys affinis
Peixes agrupados
Actinopterygii
Peixes não identificados
Pisces
Pena
Calamus penna
Calamus pennatula
Calamus spp
Pepino do mar
Holothuria grisea
Peroá
Balistes capriscus
Balistes spp
Balistes vetula
Peroá cação
Aluterus monoceros
Peroá chinelo
Aluterus monoceros
Peroá preta
Balistes vetula
Perumbeba
Pogonias courbina
Pescada
Bairdiella goeldi
Cynoscion acoupa
Cynoscion guatucupa
Cynoscion leiarchus
Cynoscion microlepidotus
Cynoscion spp
Cynoscion virescens
Isopisthus parvipinnis
Larimus breviceps
Macrodon ancylodon
Macrodon atricauda
Menticirrhus spp
Micropogonias furnieri
Nebris microps
Pogonias cromis
Sciaenidae
Stellifer spp
Pescada (branca, verdadeira)
Cynoscion leiarchus
Cynoscion microlepidotus
Pescada amarela
Cynoscion acoupa
Pescada amarela (selvagem)
Cynoscion acoupa
Pescada banana
Nebris microps
Pescada bicuda
Cynoscion microlepidotus
Sphyraena barracuda
Sphyraena spp
Pescada branca
Cynoscion leiarchus
Cynoscion microlepidotus
Pescada bucu
Cynoscion virescens
Pescada cambucu
Cynoscion virescens
Pescada cambuçu
Cynoscion virescens
Macrodon ancylodon
Pescada curuca
Micropogonias furnieri
Pescada curvina
Micropogonias furnieri
Pescada dentão
Cynoscion microlepidotus
Pescada do Piauí
Cynoscion spp
Pescada escamuda
Cynoscion spp
Pescada foguete
Macrodon atricauda
Pescada gó
Macrodon ancylodon
Pescada goiva
Sphyraena spp
Pescada maria mole
Cynoscion guatucupa
Pescada olhuda
Cynoscion guatucupa
Pescada perna de moça
Cynoscion leiarchus
Pescada real
Cynoscion virescens
Macrodon ancylodon
Macrodon atricauda
Pescada ticupa
Cynoscion acoupa
Pescada verdadeira
Cynoscion acoupa
Macrodon atricauda
Pescada vermelha
Cynoscion acoupa
Pescadinha
Isopisthus parvipinnis
Larimus breviceps
Macrodon ancylodon
Macrodon atricauda
Nebris microps
Pescadinha (aratã, sete buchos)
Isopisthus parvipinnis
Macrodon ancylodon
Nebris microps
Pescadinha gó
Macrodon ancylodon
Pescadinha mole
Cynoscion guatucupa
Larimus breviceps
Pescadinha real
Macrodon ancylodon
Macrodon atricauda
Pijirica
Kyphosus vaigiensis
Pilombeta
Anchoa spinifer
Anchovia clupeoides
Anchoviella lepidentostole
Anchoviella sp
Chloroscombrus chrysurus
Engraulidae
Lycengraulis grossidens
Pirá
Malacanthus plumieri
Pirajica
Kyphosus spp
Kyphosus vaigiensis
Pirambeba
Pogonias courbina
Pirambeju
Rachycentron canadum
Pirambu
Anisotremus surinamensis
Piranema
Megalops atlanticus
Priacanthus arenatus
Priacanthus spp
Piranjica
Kyphosus spp
Pirapema
Megalops atlanticus
Pirapiranga
Alphestes afer
Pirapiranzo
Osteichthyes
Piraúna
Cephalopholis fulva
Pirucaia
Bairdiella goeldi
Larimus breviceps
Odontoscion dentex
Pititinga
Engraulidae
Lile piquitinga
Pitiú
Mugil liza
Pitu
Metanephrops rubellus
Polvo
Eledone gaucha
Eledone massyae
Eledone spp
Octopodidae
Octopus insularis
Octopus spp
Octopus tehuelchus
Octopus vulgaris
Polvo saquinho
Eledone massyae
Pontudo
Nemadactylus bergi
Porco
Balistes capriscus
Porco chinelo
Aluterus monoceros
Porco peludo
Stephanolepis hispida
Pratibu
Mugil spp
Pratiqueira
Mugil curema
Prego
Lepidocybium flavobrunneum
Pregoaí
Strombus spp
Prejereba
Lobotes surinamensis
Quelônios
Testudines
Rabo aberto
Ocyurus chrysurus
Rabo de fogo
Anchoa januaria
Rabo seco
Cynoscion virescens
Raia
Aetobatus narinari
Atlantoraja cyclophora
Batoidea
Dipturus spp
Gymnura altavela
Hypanus spp
Mobula hypostoma
Myliobatis spp
Pseudobatos spp
Rajidae
Rajiformes
Raia bicuda
Dipturus spp
Raia borboleta
Gymnura altavela
Raia branca
Hypanus spp
Raia carimbada
Atlantoraja cyclophora
Raia emplastro
Gymnura altavela
Rajidae
Raia emplastro castelnaui
Atlantoraja castelnaui
Raia ferreira
Bathyraja schroederi
Raia jamanta
Mobula spp
Raia manteiga
Dasyatidae
Raia morcego
Myliobatis spp
Raia pintada
Aetobatus narinari
Raia ticonha
Rhinoptera spp
Raia viola
Pseudobatos spp
Raposa
Alopias spp
Rato
Ruvettus pretiosus
Realito
Rhomboplites aurorubens
Redondo
Peprilus spp
Rêmora
Echeneidae
Robalo
Centropomus parallelus
Centropomus spp
Centropomus undecimalis
Robalo flecha
Centropomus undecimalis
Robalo peba
Centropomus parallelus
Robalo peva
Centropomus parallelus
Rombudo
Trachinotus falcatus
Roncador
Conodon nobilis
Haemulon aurolineatum
Rosado
Genidens barbus
Sabão
Uraspis secunda
Sabará
Chaetodipterus faber
Saberé
Chaetodipterus faber
Pomacanthus paru
Sabonete
Labridae
Sagra
Genyatremus luteus
Saguá
Genyatremus luteus
Salema
Anisotremus virginicus
Archosargus rhomboidalis
Salmão
Mullidae
Salmonete
Mullus argentinae
Pseudupeneus maculatus
Salteira
Oligoplites saliens
Oligoplites saurus
Oligoplites spp
Sambuio
Archosargus rhomboidalis
Archosargus spp
Samenduara
Trachinotus spp
Samucanga
Cynoscion leiarchus
Sanhoá
Anisotremus surinamensis
Genyatremus luteus
Sapateira
Scyllarides brasiliensis
Sapateiro
Scyllarides brasiliensis
Sapo
Lophius gastrophysus
Sapuruna
Haemulon aurolineatum
Haemulon melanurum
Saquaritá
Stramonita haemastoma
Saramonete
Mullidae
Mulloidichthys martinicus
Mullus argentinae
Pseudupeneus maculatus
Saramunete
Pseudupeneus maculatus
Sarda
Pellona spp
Sarda sarda
Scomberomorus brasiliensis
Scomberomorus regalis
Sarda (serra)
Scomberomorus brasiliensis
Sardinha
Cetengraulis edentulus
Clupeidae
Engraulidae
Harengula clupeola
Opisthonema oglinum
Pellona harroweri
Pterengraulis atherinoides
Sardinella brasiliensis
Sardinha bandeira
Opisthonema oglinum
Sardinha boca torta
Cetengraulis edentulus
Sardinha cascadura
Harengula clupeola
Sardinha cascuda
Harengula clupeola
Sardinha do reino
Sardinella brasiliensis
Sardinha laje
Opisthonema oglinum
Sardinha mole
Pellona harroweri
Sardinha verdadeira
Sardinella brasiliensis
Sardinha vermelha
Engraulidae
Sargentinho
Abudefduf saxatilis
Sargo
Anisotremus surinamensis
Archosargus probatocephalus
Archosargus spp
Haemulidae
Sparidae
Sargo de dente
Archosargus probatocephalus
Sari sari
Bagre bagre
Sarnambi
Anomalocardia flexuosa
Sarrão
Helicolenus dactylopterus
Helicolenus spp
Sauara
Genyatremus luteus
Saúba
Lutjanus analis
Saúna
Mugil curema
Mugil spp
Savelha
Brevoortia pectinata
Brevoortia spp
Clupeiformes
Selvagem
Cynoscion acoupa
Serigado
Mycteroperca bonaci
Sernambiguara
Trachinotus falcatus
Serra
Sarda sarda
Scomberomorus brasiliensis
Scomberomorus regalis
Serrão
Scomberomorus brasiliensis
Serrinha
Sarda sarda
Scomberomorus brasiliensis
Siri
Callinectes danae
Callinectes exasperatus
Callinectes spp
Portunidae
Siri azul
Callinectes spp
Siri candeia
Achelous spinimanus
Portunus spinimanus
Siri de mangue
Callinectes exasperatus
Siri fedido
Callinectes bocourti
Siri pintado
Arenaeus cribrarius
Siri vermelho
Cronius ruber
Sirigado
Mycteroperca bonaci
Mycteroperca spp
Sirigado (badejo)
Mycteroperca bonaci
Sirioba
Lutjanus analis
Soia
Pleuronectiformes
Solteira
Oligoplites saliens
Oligoplites spp
Parona signata
Sororoca
Scomberomorus brasiliensis
Sururu
Mytella guyanensis
Mytella spp
Mytella strigata
Perna perna
Tainha
Mugil brevirostris
Mugil curema
Mugil curvidens
Mugil incilis
Mugil liza
Mugil spp
Tainha parati
Mugil curvidens
Taioba
Anomalocardia flexuosa
Tamatarana
Mugil curvidens
Mugil spp
Tamburutaca
Squilla brasiliensis
Stomatopoda
Tapioca
Osteichthyes
Tararaca
Paralonchurus brasiliensis
Tarpão
Megalops atlanticus
Tartaruga
Testudines
Tartaruga (de mar)
Testudines
Tibiro
Oligoplites spp
Timbira
Oligoplites palometa
Oligoplites spp
Timbiro
Oligoplites palometa
Oligoplites spp
Tinga
Diapterus auratus
Diapterus rhombeus
Diapterus spp
Scorpaena spp
Tintureira
Galeocerdo cuvier
Tira vira
Percophis brasiliensis
Tombiro
Oligoplites spp
Tortinha
Isopisthus parvipinnis
Trilha
Mullidae
Mullus argentinae
Trombeta
Aulostomus maculatus
Fistularia tabacaria
Trombeta vermelha
Fistularia petimba
Tubarão
Carcharhiniformes
Carcharhinus spp
Sphyrna spp
Tubarão azul
Prionace glauca
Tubarão cachorro
Pseudocarcharias kamoharai
Tubarão mako
Isurus oxyrinchus
Tubarão martelo
Sphyrna spp
Tubarão raposa
Alopias spp
Ubarana
Albula vulpes
Elops spp
Ubarana rato
Albula vulpes
Unha de velho
Tagelus plebeius
Uriacica
Cathorops spixii
Cathorops spp
Uricica
Cathorops spixii
Cathorops spp
Uritinga
Sciades proops
Urubaiana
Elops spp
Vaquara
Thunnus albacares
Vento leste
Pseudocaranx dentex
Vermelha
Lutjanus alexandrei
Lutjanus vivanus
Rhomboplites aurorubens
Vermelho
Lutjanidae
Lutjanus alexandrei
Lutjanus analis
Lutjanus apodus
Lutjanus buccanella
Lutjanus cyanopterus
Lutjanus jocu
Lutjanus purpureus
Lutjanus spp
Lutjanus synagris
Lutjanus vivanus
Ocyurus chrysurus
Rhomboplites aurorubens
Vermelho henrique
Lutjanus synagris
Vieira
Euvola ziczac
Viola
Pseudobatos horkelii
Pseudobatos spp
Viúva
Oligoplites palometa
Viúva negra
Parona signata
Viuvinha
Abudefduf saxatilis
Vivoca
Diapterus spp
Voador
Dactylopterus volitans
Exocoetidae
Hirundichthys affinis
Thunnus alalunga
Wahoo
Acanthocybium solandri
Xangó
Cetengraulis edentulus
Xarelete
Caranx bartholomaei
Caranx crysos
Caranx hippos
Caranx latus
Xaréu
Caranx bartholomaei
Caranx crysos
Caranx hippos
Caranx latus
Caranx spp
Xaréu branco
Alectis ciliaris
Xaréu preto
Caranx lugubris
Xaveia
Oligoplites saliens
Xerelete
Caranx latus
Caranx spp
Xerne
Polyprion americanus
Xira
Brachygenys chrysargyrea
Haemulon aurolineatum
Haemulon spp
Xixarro
Caranx crysos
Decapterus punctatus
Decapterus spp
Selar crumenophthalmus
Trachurus lathami
Xixarro olho de boi
Selar crumenophthalmus
Zambuio
Belonidae
Total Geral

## Sheet: SpeciesNamesOnly
Suplementar Table 3. Species and their classification into groups (lower and higher level).
NUMBER	TAXON	SMALL GROUP	LARGE GROUP
1	Abudefduf saxatilis	Actinopterygii	Pisces
2	Acanthocybium solandri	Actinopterygii	Pisces
3	Acanthurus chirurgus	Actinopterygii	Pisces
4	Acanthurus spp	Actinopterygii	Pisces
5	Achelous spinimanus	Brachyura	Crustacea
6	Actinopterygii	Actinopterygii	Pisces
7	Aetobatus narinari	Batoidea	Pisces
8	Albula spp	Actinopterygii	Pisces
9	Albula vulpes	Actinopterygii	Pisces
10	Alectis ciliaris	Actinopterygii	Pisces
11	Alopias spp	Selachii	Pisces
12	Alopias superciliosus	Selachii	Pisces
13	Alopias vulpinus	Selachii	Pisces
14	Alphestes afer	Actinopterygii	Pisces
15	Aluterus monoceros	Actinopterygii	Pisces
16	Amphiarius phrygiatus	Actinopterygii	Pisces
17	Amphiarius rugispinis	Actinopterygii	Pisces
18	Amphichthys cryptocentrus	Actinopterygii	Pisces
19	Anchoa januaria	Actinopterygii	Pisces
20	Anchoa spinifer	Actinopterygii	Pisces
21	Anchoa spp	Actinopterygii	Pisces
22	Anchoa tricolor	Actinopterygii	Pisces
23	Anchovia clupeoides	Actinopterygii	Pisces
24	Anchoviella lepidentostole	Actinopterygii	Pisces
25	Anchoviella sp	Actinopterygii	Pisces
26	Anguilliformes	Actinopterygii	Pisces
27	Anisotremus surinamensis	Actinopterygii	Pisces
28	Anisotremus virginicus	Actinopterygii	Pisces
29	Anomalocardia flexuosa	Bivalvia	Mollusca
30	Antimora rostrata	Actinopterygii	Pisces
31	Archosargus probatocephalus	Actinopterygii	Pisces
32	Archosargus rhomboidalis	Actinopterygii	Pisces
33	Archosargus spp	Actinopterygii	Pisces
34	Arenaeus cribrarius	Brachyura	Crustacea
35	Ariidae	Actinopterygii	Pisces
36	Aristaeomorpha foliacea	Dendrobranchiata	Crustacea
37	Aristaeopsis edwardsiana	Dendrobranchiata	Crustacea
38	Aristeus antillensis	Dendrobranchiata	Crustacea
39	Artemesia longinaris	Dendrobranchiata	Crustacea
40	Aspistor luniscutis	Actinopterygii	Pisces
41	Aspistor quadriscutis	Actinopterygii	Pisces
42	Astroscopus sexspinosus	Actinopterygii	Pisces
43	Astroscopus spp	Actinopterygii	Pisces
44	Atherinella brasiliensis	Actinopterygii	Pisces
45	Atlantoraja castelnaui	Batoidea	Pisces
46	Atlantoraja cyclophora	Batoidea	Pisces
47	Aulostomus maculatus	Actinopterygii	Pisces
48	Auxis thazard	Actinopterygii	Pisces
49	Bagre bagre	Actinopterygii	Pisces
50	Bagre marinus	Actinopterygii	Pisces
51	Bairdiella goeldi	Actinopterygii	Pisces
52	Balistes capriscus	Actinopterygii	Pisces
53	Balistes spp	Actinopterygii	Pisces
54	Balistes vetula	Actinopterygii	Pisces
55	Bathygobius soporator	Actinopterygii	Pisces
56	Bathyraja schroederi	Batoidea	Pisces
57	Batoidea	Batoidea	Pisces
58	Batrachoides surinamensis	Actinopterygii	Pisces
59	Batrachoidiformes	Actinopterygii	Pisces
60	Belonidae	Actinopterygii	Pisces
61	Beloniformes	Actinopterygii	Pisces
62	Beryx splendens	Actinopterygii	Pisces
63	Bivalvia	Bivalvia	Mollusca
64	Brachygenys chrysargyrea	Actinopterygii	Pisces
65	Brachyura	Brachyura	Crustacea
66	Brevoortia pectinata	Actinopterygii	Pisces
67	Brevoortia spp	Actinopterygii	Pisces
68	Calamus penna	Actinopterygii	Pisces
69	Calamus pennatula	Actinopterygii	Pisces
70	Calamus spp	Actinopterygii	Pisces
71	Callinectes bocourti	Brachyura	Crustacea
72	Callinectes danae	Brachyura	Crustacea
73	Callinectes exasperatus	Brachyura	Crustacea
74	Callinectes spp	Brachyura	Crustacea
75	Carangidae	Actinopterygii	Pisces
76	Caranx bartholomaei	Actinopterygii	Pisces
77	Caranx crysos	Actinopterygii	Pisces
78	Caranx hippos	Actinopterygii	Pisces
79	Caranx latus	Actinopterygii	Pisces
80	Caranx lugubris	Actinopterygii	Pisces
81	Caranx spp	Actinopterygii	Pisces
82	Carcharhinidae	Selachii	Pisces
83	Carcharhiniformes	Selachii	Pisces
84	Carcharhinus acronotus	Selachii	Pisces
85	Carcharhinus falciformis	Selachii	Pisces
86	Carcharhinus leucas	Selachii	Pisces
87	Carcharhinus limbatus	Selachii	Pisces
88	Carcharhinus longimanus	Selachii	Pisces
89	Carcharhinus obscurus	Selachii	Pisces
90	Carcharhinus plumbeus	Selachii	Pisces
91	Carcharhinus porosus	Selachii	Pisces
92	Carcharhinus spp	Selachii	Pisces
93	Carcharias taurus	Selachii	Pisces
94	Cardisoma guanhumi	Brachyura	Crustacea
95	Cathorops spixii	Actinopterygii	Pisces
96	Cathorops spp	Actinopterygii	Pisces
97	Caulolatilus chrysops	Actinopterygii	Pisces
98	Centropomus parallelus	Actinopterygii	Pisces
99	Centropomus spp	Actinopterygii	Pisces
100	Centropomus undecimalis	Actinopterygii	Pisces
101	Cephalopholis fulva	Actinopterygii	Pisces
102	Cephalopoda Teuthida	Cephalopoda	Mollusca
103	Cetengraulis edentulus	Actinopterygii	Pisces
104	Chaceon maritae	Brachyura	Crustacea
105	Chaceon notialis	Brachyura	Crustacea
106	Chaceon ramosae	Brachyura	Crustacea
107	Chaceon spp	Brachyura	Crustacea
108	Chaetodipterus faber	Actinopterygii	Pisces
109	Chloroscombrus chrysurus	Actinopterygii	Pisces
110	Clupeidae	Actinopterygii	Pisces
111	Clupeiformes	Actinopterygii	Pisces
112	Conger orbignianus	Actinopterygii	Pisces
113	Conger spp	Actinopterygii	Pisces
114	Conodon nobilis	Actinopterygii	Pisces
115	Cookeolus japonicus	Actinopterygii	Pisces
116	Coryphaena hippurus	Actinopterygii	Pisces
117	Coryphaena spp	Actinopterygii	Pisces
118	Crassostrea brasiliana	Bivalvia	Mollusca
119	Crassostrea rhizophorae	Bivalvia	Mollusca
120	Crassostrea spp	Bivalvia	Mollusca
121	Cronius ruber	Brachyura	Crustacea
122	Crustacea	Crustacea	Crustacea
123	Ctenosciaena gracilicirrhus	Actinopterygii	Pisces
124	Cynoponticus savanna	Actinopterygii	Pisces
125	Cynoscion acoupa	Actinopterygii	Pisces
126	Cynoscion guatucupa	Actinopterygii	Pisces
127	Cynoscion jamaicensis	Actinopterygii	Pisces
128	Cynoscion leiarchus	Actinopterygii	Pisces
129	Cynoscion microlepidotus	Actinopterygii	Pisces
130	Cynoscion spp	Actinopterygii	Pisces
131	Cynoscion virescens	Actinopterygii	Pisces
132	Dactylopterus volitans	Actinopterygii	Pisces
133	Dasyatidae	Batoidea	Pisces
134	Decapoda	Crustacea	Crustacea
135	Decapterus punctatus	Actinopterygii	Pisces
136	Decapterus spp	Actinopterygii	Pisces
137	Dermatolepis inermis	Actinopterygii	Pisces
138	Diapterus auratus	Actinopterygii	Pisces
139	Diapterus rhombeus	Actinopterygii	Pisces
140	Diapterus spp	Actinopterygii	Pisces
141	Diplectrum spp	Actinopterygii	Pisces
142	Diplodus argenteus	Actinopterygii	Pisces
143	Dipturus spp	Batoidea	Pisces
144	Dissostichus eleginoides	Actinopterygii	Pisces
145	Doryteuthis pleii	Cephalopoda	Mollusca
146	Doryteuthis sanpaulensis	Cephalopoda	Mollusca
147	Doryteuthis spp	Cephalopoda	Mollusca
148	Echeneidae	Actinopterygii	Pisces
149	Echinometra lucunter	Echinidea	Echinodermata
150	Elagatis bipinnulata	Actinopterygii	Pisces
151	Elasmobranchii	Neoselachii	Pisces
152	Eledone gaucha	Cephalopoda	Mollusca
153	Eledone massyae	Cephalopoda	Mollusca
154	Eledone spp	Cephalopoda	Mollusca
155	Elops spp	Actinopterygii	Pisces
156	Engraulidae	Actinopterygii	Pisces
157	Engraulis anchoita	Actinopterygii	Pisces
158	Epinephelus adscensionis	Actinopterygii	Pisces
159	Epinephelus itajara	Actinopterygii	Pisces
160	Epinephelus marginatus	Actinopterygii	Pisces
161	Epinephelus morio	Actinopterygii	Pisces
162	Epinephelus niveatus	Actinopterygii	Pisces
163	Epinephelus spp	Actinopterygii	Pisces
164	Etelis oculatus	Actinopterygii	Pisces
165	Eucinostomus spp	Actinopterygii	Pisces
166	Eugerres brasilianus	Actinopterygii	Pisces
167	Euthynnus alletteratus	Actinopterygii	Pisces
168	Euvola ziczac	Bivalvia	Mollusca
169	Exocoetidae	Actinopterygii	Pisces
170	Farfantepenaeus brasiliensis	Dendrobranchiata	Crustacea
171	Farfantepenaeus paulensis	Dendrobranchiata	Crustacea
172	Farfantepenaeus spp	Dendrobranchiata	Crustacea
173	Farfantepenaeus subtilis	Dendrobranchiata	Crustacea
174	Fistularia petimba	Actinopterygii	Pisces
175	Fistularia tabacaria	Actinopterygii	Pisces
176	Galeocerdo cuvier	Selachii	Pisces
177	Galeorhinus galeus	Selachii	Pisces
178	Gastropoda	Gastropoda	Mollusca
179	Gempylidae	Actinopterygii	Pisces
180	Gempylus serpens	Actinopterygii	Pisces
181	Genidens barbus	Actinopterygii	Pisces
182	Genidens genidens	Actinopterygii	Pisces
183	Genyatremus luteus	Actinopterygii	Pisces
184	Genypterus brasiliensis	Actinopterygii	Pisces
185	Gerreidae	Actinopterygii	Pisces
186	Geryonidae	Brachyura	Crustacea
187	Ginglymostoma cirratum	Selachii	Pisces
188	Gobioides broussonnetii	Actinopterygii	Pisces
189	Gobionellus oceanicus	Actinopterygii	Pisces
190	Goniopsis cruentata	Brachyura	Crustacea
191	Guavina guavina	Actinopterygii	Pisces
192	Gymnothorax spp	Actinopterygii	Pisces
193	Gymnura altavela	Batoidea	Pisces
194	Haemulidae	Actinopterygii	Pisces
195	Haemulon aurolineatum	Actinopterygii	Pisces
196	Haemulon melanurum	Actinopterygii	Pisces
197	Haemulon plumierii	Actinopterygii	Pisces
198	Haemulon spp	Actinopterygii	Pisces
199	Harengula clupeola	Actinopterygii	Pisces
200	Helicolenus dactylopterus	Actinopterygii	Pisces
201	Helicolenus spp	Actinopterygii	Pisces
202	Hemicaranx amblyrhynchus	Actinopterygii	Pisces
203	Hemiramphus brasiliensis	Actinopterygii	Pisces
204	Hemiramphus spp	Actinopterygii	Pisces
205	Hexanchus griseus	Selachii	Pisces
206	Hirundichthys affinis	Actinopterygii	Pisces
207	Holocentrus adscensionis	Actinopterygii	Pisces
208	Holothuria grisea	Holothuriida	Echinodermata
209	Hypanus spp	Batoidea	Pisces
210	Hyperoglyphe macrophthalma	Actinopterygii	Pisces
211	Hyporhamphus spp	Actinopterygii	Pisces
212	Hyporthodus flavolimbatus	Actinopterygii	Pisces
213	Hyporthodus niveatus	Actinopterygii	Pisces
214	Hyporthodus spp	Actinopterygii	Pisces
215	Illex argentinus	Cephalopoda	Mollusca
216	Isopisthus parvipinnis	Actinopterygii	Pisces
217	Istiophoridae	Actinopterygii	Pisces
218	Istiophorus platypterus	Actinopterygii	Pisces
219	Isurus oxyrinchus	Selachii	Pisces
220	Isurus paucus	Selachii	Pisces
221	Isurus spp	Selachii	Pisces
222	Kajikia albida	Actinopterygii	Pisces
223	Katsuwonus pelamis	Actinopterygii	Pisces
224	Kyphosus spp	Actinopterygii	Pisces
225	Kyphosus vaigiensis	Actinopterygii	Pisces
226	Labridae	Actinopterygii	Pisces
227	Lagocephalus laevigatus	Actinopterygii	Pisces
228	Lamna nasus	Selachii	Pisces
229	Lampris spp	Actinopterygii	Pisces
230	Larimus breviceps	Actinopterygii	Pisces
231	Lepidocybium flavobrunneum	Actinopterygii	Pisces
232	Lepophidium brevibarbe	Actinopterygii	Pisces
233	Lile piquitinga	Actinopterygii	Pisces
234	Lithodes murrayi	Anomura	Crustacea
235	Lithodes santolla	Anomura	Crustacea
236	Litopenaeus schmitti	Dendrobranchiata	Crustacea
237	Lobotes surinamensis	Actinopterygii	Pisces
238	Loliginidae	Cephalopoda	Mollusca
239	Lolliguncula brevis	Cephalopoda	Mollusca
240	Lophius gastrophysus	Actinopterygii	Pisces
241	Lopholatilus villarii	Actinopterygii	Pisces
242	Lutjanidae	Actinopterygii	Pisces
243	Lutjanus alexandrei	Actinopterygii	Pisces
244	Lutjanus analis	Actinopterygii	Pisces
245	Lutjanus apodus	Actinopterygii	Pisces
246	Lutjanus buccanella	Actinopterygii	Pisces
247	Lutjanus cyanopterus	Actinopterygii	Pisces
248	Lutjanus jocu	Actinopterygii	Pisces
249	Lutjanus purpureus	Actinopterygii	Pisces
250	Lutjanus spp	Actinopterygii	Pisces
251	Lutjanus synagris	Actinopterygii	Pisces
252	Lutjanus vivanus	Actinopterygii	Pisces
253	Lycengraulis grossidens	Actinopterygii	Pisces
254	Macrodon ancylodon	Actinopterygii	Pisces
255	Macrodon atricauda	Actinopterygii	Pisces
256	Macrourus spp	Actinopterygii	Pisces
257	Macruronus novaezelandiae	Actinopterygii	Pisces
258	Makaira nigricans	Actinopterygii	Pisces
259	Malacanthidae	Actinopterygii	Pisces
260	Malacanthus plumieri	Actinopterygii	Pisces
261	Mammalia	Mammalia	Mammalia
262	Masturus lanceolatus	Actinopterygii	Pisces
263	Megalops atlanticus	Actinopterygii	Pisces
264	Menippe nodifrons	Brachyura	Crustacea
265	Menticirrhus martinicensis	Actinopterygii	Pisces
266	Menticirrhus spp	Actinopterygii	Pisces
267	Merluccius hubbsi	Actinopterygii	Pisces
268	Metanephrops rubellus	Astacidea	Crustacea
269	Micropogonias furnieri	Actinopterygii	Pisces
270	Mitsukurina owstoni	Selachii	Pisces
271	Mobula hypostoma	Batoidea	Pisces
272	Mobula spp	Batoidea	Pisces
273	Mollusca	Mollusca	Mollusca
274	Mugil brevirostris	Actinopterygii	Pisces
275	Mugil curema	Actinopterygii	Pisces
276	Mugil curvidens	Actinopterygii	Pisces
277	Mugil incilis	Actinopterygii	Pisces
278	Mugil liza	Actinopterygii	Pisces
279	Mugil spp	Actinopterygii	Pisces
280	Mullidae	Actinopterygii	Pisces
281	Mulloidichthys martinicus	Actinopterygii	Pisces
282	Mullus argentinae	Actinopterygii	Pisces
283	Muraena spp	Actinopterygii	Pisces
284	Mustelus canis	Selachii	Pisces
285	Mustelus schmitti	Selachii	Pisces
286	Mustelus spp	Selachii	Pisces
287	Mycteroperca acutirostris	Actinopterygii	Pisces
288	Mycteroperca bonaci	Actinopterygii	Pisces
289	Mycteroperca interstitialis	Actinopterygii	Pisces
290	Mycteroperca microlepis	Actinopterygii	Pisces
291	Mycteroperca spp	Actinopterygii	Pisces
292	Myliobatis spp	Batoidea	Pisces
293	Myrichthys breviceps	Actinopterygii	Pisces
294	Myripristis jacobus	Actinopterygii	Pisces
295	Mysticeti	Mammalia	Mammalia
296	Mytella guyanensis	Bivalvia	Mollusca
297	Mytella spp	Bivalvia	Mollusca
298	Mytella strigata	Bivalvia	Mollusca
299	Naucrates ductor	Actinopterygii	Pisces
300	Nebris microps	Actinopterygii	Pisces
301	Nemadactylus bergi	Actinopterygii	Pisces
302	Notarius grandicassis	Actinopterygii	Pisces
303	Notorynchus cepedianus	Selachii	Pisces
304	Octopodidae	Cephalopoda	Mollusca
305	Octopus insularis	Cephalopoda	Mollusca
306	Octopus spp	Cephalopoda	Mollusca
307	Octopus tehuelchus	Cephalopoda	Mollusca
308	Octopus vulgaris	Cephalopoda	Mollusca
309	Ocyurus chrysurus	Actinopterygii	Pisces
310	Odontesthes argentinensis	Actinopterygii	Pisces
311	Odontesthes spp	Actinopterygii	Pisces
312	Odontoscion dentex	Actinopterygii	Pisces
313	Oligoplites palometa	Actinopterygii	Pisces
314	Oligoplites saliens	Actinopterygii	Pisces
315	Oligoplites saurus	Actinopterygii	Pisces
316	Oligoplites spp	Actinopterygii	Pisces
317	Ophichthus spp	Actinopterygii	Pisces
318	Ophidiidae	Actinopterygii	Pisces
319	Opisthonema oglinum	Actinopterygii	Pisces
320	Orthopristis rubra	Actinopterygii	Pisces
321	Orthopristis scapularis	Actinopterygii	Pisces
322	Osteichthyes	Actinopterygii	Pisces
323	Pagrus pagrus	Actinopterygii	Pisces
324	Panulirus argus	Achelata	Crustacea
325	Panulirus laevicauda	Achelata	Crustacea
326	Panulirus spp	Achelata	Crustacea
327	Paralichthyidae	Actinopterygii	Pisces
328	Paralichthys orbignyanus	Actinopterygii	Pisces
329	Paralichthys patagonicus	Actinopterygii	Pisces
330	Paralichthys spp	Actinopterygii	Pisces
331	Paralomis aculeata	Anomura	Crustacea
332	Paralonchurus brasiliensis	Actinopterygii	Pisces
333	Paranisotremus moricandi	Actinopterygii	Pisces
334	Pareques acuminatus	Actinopterygii	Pisces
335	Parona signata	Actinopterygii	Pisces
336	Pellona harroweri	Actinopterygii	Pisces
337	Pellona spp	Actinopterygii	Pisces
338	Penaeidae	Dendrobranchiata	Crustacea
339	Peprilus spp	Actinopterygii	Pisces
340	Percophis brasiliensis	Actinopterygii	Pisces
341	Perna perna	Bivalvia	Mollusca
342	Phacoides pectinatus	Bivalvia	Mollusca
343	Pinguipedidae	Actinopterygii	Pisces
344	Pisces	Pisces	Pisces
345	Pleoticus muelleri	Dendrobranchiata	Crustacea
346	Plesionika edwardsii	Caridea	Crustacea
347	Pleuronectiformes	Actinopterygii	Pisces
348	Pogonias courbina	Actinopterygii	Pisces
349	Pogonias cromis	Actinopterygii	Pisces
350	Polydactylus spp	Actinopterygii	Pisces
351	Polydactylus virginicus	Actinopterygii	Pisces
352	Polymixia lowei	Actinopterygii	Pisces
353	Polyprion americanus	Actinopterygii	Pisces
354	Pomacanthidae	Actinopterygii	Pisces
355	Pomacanthus paru	Actinopterygii	Pisces
356	Pomatomus saltatrix	Actinopterygii	Pisces
357	Porichthys porosissimus	Actinopterygii	Pisces
358	Portunidae	Brachyura	Crustacea
359	Portunus spinimanus	Brachyura	Crustacea
360	Priacanthus arenatus	Actinopterygii	Pisces
361	Priacanthus spp	Actinopterygii	Pisces
362	Prionace glauca	Selachii	Pisces
363	Prionotus punctatus	Actinopterygii	Pisces
364	Prionotus spp	Actinopterygii	Pisces
365	Pristis pectinata	Batoidea	Pisces
366	Pristis spp	Batoidea	Pisces
367	Pseudobatos horkelii	Batoidea	Pisces
368	Pseudobatos percellens	Batoidea	Pisces
369	Pseudobatos spp	Batoidea	Pisces
370	Pseudocaranx dentex	Actinopterygii	Pisces
371	Pseudocarcharias kamoharai	Selachii	Pisces
372	Pseudopercis numida	Actinopterygii	Pisces
373	Pseudopercis spp	Actinopterygii	Pisces
374	Pseudupeneus maculatus	Actinopterygii	Pisces
375	Pterengraulis atherinoides	Actinopterygii	Pisces
376	Pteroplatytrygon violacea	Batoidea	Pisces
377	Rachycentron canadum	Actinopterygii	Pisces
378	Rajidae	Batoidea	Pisces
379	Rajiformes	Batoidea	Pisces
380	Rhinoptera spp	Batoidea	Pisces
381	Rhizoprionodon lalandii	Selachii	Pisces
382	Rhizoprionodon porosus	Selachii	Pisces
383	Rhizoprionodon spp	Selachii	Pisces
384	Rhomboplites aurorubens	Actinopterygii	Pisces
385	Ruvettus pretiosus	Actinopterygii	Pisces
386	Sarda sarda	Actinopterygii	Pisces
387	Sardinella brasiliensis	Actinopterygii	Pisces
388	Scaridae	Actinopterygii	Pisces
389	Scarus trispinosus	Actinopterygii	Pisces
390	Sciades couma	Actinopterygii	Pisces
391	Sciades herzbergii	Actinopterygii	Pisces
392	Sciades parkeri	Actinopterygii	Pisces
393	Sciades proops	Actinopterygii	Pisces
394	Sciaenidae	Actinopterygii	Pisces
395	Scomber colias	Actinopterygii	Pisces
396	Scomberomorus brasiliensis	Actinopterygii	Pisces
397	Scomberomorus cavalla	Actinopterygii	Pisces
398	Scomberomorus regalis	Actinopterygii	Pisces
399	Scombridae	Actinopterygii	Pisces
400	Scorpaena plumieri	Actinopterygii	Pisces
401	Scorpaena spp	Actinopterygii	Pisces
402	Scyliorhinus spp	Selachii	Pisces
403	Scyllarides brasiliensis	Achelata	Crustacea
404	Scyllarides deceptor	Achelata	Crustacea
405	Scyllarides delfosi	Achelata	Crustacea
406	Scyllarides spp	Achelata	Crustacea
407	Selachii	Selachii	Pisces
408	Selar crumenophthalmus	Actinopterygii	Pisces
409	Selene setapinnis	Actinopterygii	Pisces
410	Selene spp	Actinopterygii	Pisces
411	Selene vomer	Actinopterygii	Pisces
412	Semirossia tenera	Cephalopoda	Mollusca
413	Seriola dumerili	Actinopterygii	Pisces
414	Seriola fasciata	Actinopterygii	Pisces
415	Seriola lalandi	Actinopterygii	Pisces
416	Seriola rivoliana	Actinopterygii	Pisces
417	Seriola spp	Actinopterygii	Pisces
418	Sicyonia dorsalis	Dendrobranchiata	Crustacea
419	Sparidae	Actinopterygii	Pisces
420	Sparisoma axillare	Actinopterygii	Pisces
421	Sparisoma frondosum	Actinopterygii	Pisces
422	Sparisoma spp	Actinopterygii	Pisces
423	Sphyraena barracuda	Actinopterygii	Pisces
424	Sphyraena guachancho	Actinopterygii	Pisces
425	Sphyraena spp	Actinopterygii	Pisces
426	Sphyraena tome	Actinopterygii	Pisces
427	Sphyrna lewini	Selachii	Pisces
428	Sphyrna mokarran	Selachii	Pisces
429	Sphyrna spp	Selachii	Pisces
430	Sphyrna tiburo	Selachii	Pisces
431	Squalus spp	Selachii	Pisces
432	Squatina spp	Selachii	Pisces
433	Squatinidae	Selachii	Pisces
434	Squilla brasiliensis	Stomatopoda	Crustacea
435	Stellifer spp	Actinopterygii	Pisces
436	Stephanolepis hispida	Actinopterygii	Pisces
437	Stomatopoda	Stomatopoda	Crustacea
438	Stramonita haemastoma	Gastropoda	Mollusca
439	Strombus spp	Gastropoda	Mollusca
440	Strongylura marina	Actinopterygii	Pisces
441	Syacium spp	Actinopterygii	Pisces
442	Synodus spp	Actinopterygii	Pisces
443	Tagelus plebeius	Bivalvia	Mollusca
444	Testudinata	Testudines	Reptilia
445	Tetraodontidae	Actinopterygii	Pisces
446	Tetraodontiformes	Actinopterygii	Pisces
447	Tetrapturus pfluegeri	Actinopterygii	Pisces
448	Teuthida	Cephalopoda	Mollusca
449	Thalassophryne spp	Actinopterygii	Pisces
450	Thunnus alalunga	Actinopterygii	Pisces
451	Thunnus albacares	Actinopterygii	Pisces
452	Thunnus atlanticus	Actinopterygii	Pisces
453	Thunnus obesus	Actinopterygii	Pisces
454	Thunnus spp	Actinopterygii	Pisces
455	Thunnus thynnus	Actinopterygii	Pisces
456	Thyrsites lepidopodea	Actinopterygii	Pisces
457	Trachinotus carolinus	Actinopterygii	Pisces
458	Trachinotus falcatus	Actinopterygii	Pisces
459	Trachinotus goodei	Actinopterygii	Pisces
460	Trachinotus marginatus	Actinopterygii	Pisces
461	Trachinotus spp	Actinopterygii	Pisces
462	Trachurus lathami	Actinopterygii	Pisces
463	Trichiurus lepturus	Actinopterygii	Pisces
464	Ucides cordatus	Brachyura	Crustacea
465	Umbrina canosai	Actinopterygii	Pisces
466	Umbrina coroides	Actinopterygii	Pisces
467	Umbrina spp	Actinopterygii	Pisces
468	Uraspis secunda	Actinopterygii	Pisces
469	Urophycis brasiliensis	Actinopterygii	Pisces
470	Urophycis cirrata	Actinopterygii	Pisces
471	Urophycis mystacea	Actinopterygii	Pisces
472	Urophycis spp	Actinopterygii	Pisces
473	Volutidae	Gastropoda	Mollusca
474	Xiphias gladius	Actinopterygii	Pisces
475	Xiphopenaeus kroyeri	Dendrobranchiata	Crustacea
476	Zenopsis conchifer	Actinopterygii	Pisces
477	Zidona dufresnei	Gastropoda	Mollusca

## Sheet: CommonNamesOnly
Suplementar Table 4. Common names in the reconstructed database of marine landings for Brazil.
NUMBER	COMMON NAME
1	Abrótea
2	Abrótea de fundo
3	Abrótea de profundidade
4	Abrótea verdadeira
5	Acará açu
6	Água fria
7	Agulha
8	Agulha branca
9	Agulha preta
10	Agulhão
11	Agulhão azul
12	Agulhão bandeira
13	Agulhão branco
14	Agulhão de vela
15	Agulhão maka
16	Agulhão marinho
17	Agulhão negro
18	Agulhão vela
19	Agulhão vela platypterus
20	Agulhão verde
21	Agulhinha
22	Aipim
23	Albacora
24	Albacora (atum)
25	Albacora azul
26	Albacora bandolim
27	Albacora branca
28	Albacora de laje
29	Albacora lage
30	Albacora laje
31	Albacorinha
32	Alfonsino
33	Almeja
34	Amboré
35	Amor sem olho
36	Amoréia
37	Anchoita
38	Anchova
39	Anchoveta
40	Anequim
41	Anjo
42	Antimora azul
43	Arabaiana
44	Aracanguira
45	Aracaroba
46	Aracimbora
47	Aratu
48	Arenga
49	Arenque
50	Ariacó
51	Ariocó
52	Arraia
53	Arraia preta
54	Atum
55	Atum atlântico
56	Atum azul
57	Atum legítimo
58	Atum verdadeiro
59	Avoador
60	Azeiteira
61	Bacalhau
62	Bacamarte
63	Badejo
64	Badejo da areia
65	Badejo mira
66	Badejo quadrado
67	Badejo saltão
68	Bagre
69	Bagre amarelo
70	Bagre bandeira
71	Bagre branco
72	Bagre guriaçu
73	Baiacu
74	Baiacu arara
75	Baleia
76	Bandeirada
77	Bandeirado
78	Barbeiro
79	Barbudo
80	Barracuda
81	Batata
82	Batata da lama
83	Batata da pedra
84	Batera
85	Baúna
86	Beijupirá
87	Berbigão
88	Betara
89	Bicuda
90	Bicuda
91	Bicudinha
92	Bicudo
93	Bijupirá
94	Biquara
95	Boca mole
96	Boca negra
97	Boca torta
98	Bom nome
99	Bonito
100	Bonito cachorra
101	Bonito cachorro
102	Bonito gaiado
103	Bonito listrado
104	Bonito pintado
105	Bonito serrinha
106	Borriquete
107	Budião
108	Budião azul
109	Budião batata
110	Búzio
111	Cabeça dura
112	Cabeçudo
113	Cabra
114	Cabrinha
115	Cação
116	Cação anequim
117	Cação anjo
118	Cação azeiteiro
119	Cação azul
120	Cação bagre
121	Cação baía
122	Cação barriga d´água
123	Cação bico doce
124	Cação branco
125	Cação bruxa
126	Cação cabeça chata
127	Cação cavala
128	Cação cola fina
129	Cação de escama
130	Cação espada
131	Cação espadarte
132	Cação fidalgo
133	Cação frango
134	Cação galha branca
135	Cação galha preta
136	Cação galhudo
137	Cação gato
138	Cação gatuzo
139	Cação jaguara
140	Cação lixa
141	Cação lombo preto
142	Cação mangona
143	Cação martelo
144	Cação moro
145	Cação panã
146	Cação rabo seco
147	Cação rajado
148	Cação raposa
149	Cação rola rola
150	Cação roliço
151	Cação tigre
152	Cação vaca
153	Cação viola
154	Caçari
155	Cacetão
156	Caçonete
157	Caíca
158	Calafate
159	Calamar
160	Calamar argentino
161	Calunga
162	Camarão
163	Camarão alistado
164	Camarão barba ruça
165	Camarão branco
166	Camarão carabineiro
167	Camarão cristalino
168	Camarão da pedra
169	Camarão estuarino
170	Camarão ferrinho
171	Camarão grande
172	Camarão legítimo
173	Camarão listrado
174	Camarão médio
175	Camarão moruno
176	Camarão pequeno
177	Camarão piticaia
178	Camarão rosa
179	Camarão santana
180	Camarão sete barbas
181	Cambeba
182	Cambeua
183	Cambeva
184	Camboriaçu
185	Cambuba
186	Cambuçu
187	Camorim (mar)
188	Camurim
189	Camuru
190	Camurupim
191	Canapu
192	Cangatá
193	Cangatã
194	Cangoá
195	Canguá
196	Canguira
197	Canguiro
198	Canguito
199	Cangulo
200	Canhanha
201	Cantante
202	Capado
203	Cará
204	Carabinero
205	Caramujo
206	Caramuru
207	Caranguejo
208	Caranguejo (água doce)
209	Caranguejo (de água doce)
210	Caranguejo (de mar)
211	Caranguejo africano
212	Caranguejo centolla
213	Caranguejo de profundidade
214	Caranguejo guaia
215	Caranguejo murray
216	Caranguejo pedra vermelha
217	Caranguejo real
218	Caranguejo santola
219	Caranguejo uçá
220	Caranguejo vermelho
221	Caranha
222	Caranha (vermelho)
223	Caranha vermelha
224	Caranha vermelho
225	Caraoca
226	Carapau
227	Carapeba
228	Carapicu
229	Carapitanga
230	Carapitinga
231	Caraputanga
232	Caraqui amarelo
233	Caratinga
234	Caraúna
235	Carrapato
236	Cascote
237	Cassari
238	Castanha
239	Catana
240	Catuá
241	Cavala
242	Cavala empinge
243	Cavala preta
244	Cavala real
245	Cavalinha
246	Cavalinha do norte
247	Cetáceos
248	Chancarona
249	Chave
250	Chaveta
251	Cherne
252	Cherne galha amarela
253	Cherne poveiro
254	Cherne verdadeiro
255	Chicharro
256	Choupa
257	Chumberga
258	Chumbinho
259	Cioba
260	Cirioba
261	Cirurgião
262	Coió
263	Concha
264	Congro
265	Congro negro
266	Congro preto
267	Congro rosa
268	Corcoroca
269	Coró
270	Corongo
271	Coroque
272	Corvina
273	Croaçu
274	Croassu
275	Crustáceos não identificados
276	Curimã
277	Curuba
278	Curuca
279	Cururuca
280	Dentão
281	Dentuça
282	Dorminhoco
283	Dourada
284	Dourado
285	Emplastro
286	Enchova
287	Enchova preta
288	Enguia
289	Enxada
290	Enxova
291	Escamuda
292	Escolar
293	Espada
294	Espadarte
295	Falso voador
296	Farnangaio
297	Ferreiro
298	Ferrinho
299	Fofa
300	Frade
301	Galha de cação
302	Galo
303	Galo de penacho
304	Galo de profundidade
305	Galo do alto
306	Galo sem penacho
307	Garabebeu
308	Garaçapé
309	Garacimbora
310	Garajuba
311	Garapau
312	Garassuma
313	Garaximbora
314	Garoupa
315	Garoupa de São Tomé
316	Garoupinha
317	Gato
318	Gereba
319	Goete
320	Golosa
321	Gorana
322	Gordinho
323	Gordinho (paru)
324	Gorona
325	Gostosa
326	Graçaim
327	Graçainha
328	Guacioba
329	Guaiamum
330	Guaibira
331	Guaiúba
332	Guaivira
333	Guaracema
334	Guaracimbora
335	Guaraiuba
336	Guarajuba
337	Guarassuma
338	Guaraúba
339	Guaravira
340	Guaraximbora
341	Guaricema
342	Gurijuba
343	Jabu
344	Jacundá
345	Jaguara
346	Jaguareça
347	Jaguareçá
348	Jaguariça
349	Jaguariçá
350	Jagussara
351	Jamanta mirim
352	Jiquiri amarelo
353	Judeu
354	Juquiri
355	Juruna
356	Jurupiranga
357	Lagarto
358	Lagosta
359	Lagosta cabo verde
360	Lagosta sapateira
361	Lagosta verde
362	Lagosta vermelha
363	Lagostim
364	Lambreta
365	Lanceta
366	Linguado
367	Linguado areia
368	Linguado vermelho
369	Lírio
370	Lua
371	Lula
372	Lula argentina
373	Lula branca
374	Lula saco de boi
375	Macaço
376	Maçambê
377	Machote
378	Maçunim
379	Mamangá
380	Mamangá liso
381	Mamíferos aquáticos
382	Mangangá
383	Mangangá liso
384	Mangona
385	Manjuba
386	Manjuba branca
387	Manjuba chata
388	Manjuba de iguape
389	Manjubão
390	Marcasso
391	Margarida
392	Maria Luísa
393	Maria luíza
394	Maria mole
395	Marimbá
396	Mariquita
397	Marisco
398	Marlim
399	Marlim preto
400	Marlin azul
401	Marlin branco
402	Maromba
403	Meca
404	Meka
405	Mercador
406	Merete
407	Merluza
408	Merluza de cola
409	Merluza negra
410	Mero
411	Mero gato
412	Mestiço
413	Mexilhão
414	Mexilhão da pedra
415	Mexilhão do mangue
416	Michole
417	Michole de areia
418	Milongo
419	Miolo de caracol
420	Miracéu
421	Miragaia
422	Miraguaia
423	Mirim
424	Miroró
425	Mirucaia
426	Mistura
427	Mocinha
428	Moka
429	Molusco
430	Moluscos não especificados
431	Moluscos não identificados
432	Moréia
433	Morongo
434	Mororó
435	Mouka
436	Muçum
437	Mulata
438	Mulatinha
439	Muzundu
440	Namorado
441	Niquim
442	Olhão
443	Olhete
444	Olho de boi
445	Olho de cão
446	Olhudo
447	Olhudo
448	Oriacica
449	Oriacó
450	Ostra
451	Ouriço
452	Outros
453	Outros carangídeos
454	Outros crustáceos
455	Outros esparídeos
456	Outros moluscos
457	Outros peixes
458	Outros peixes não identificados
459	Outros peixes pelágicos não identificados
460	Outros tubarões
461	Ovas
462	Oveva
463	Pacamão
464	Pai joão
465	Palombeta
466	Pampo
467	Pampo galhudo
468	Pampo malhado
469	Papa figo
470	Papa fina
471	Papa moscas
472	Papa terra
473	Papagaio
474	Papaterra
475	Papuda
476	Parambiju
477	Pararê
478	Parati
479	Parati barbudo
480	Parati olho de fogo
481	Pargo
482	Pargo coivara
483	Pargo ferreira
484	Pargo pena
485	Pargo rosa
486	Parona
487	Paru
488	Paru 1
489	Paru 2
490	Paru branco
491	Parum
492	Pataca
493	Peixe agulha
494	Peixe batata
495	Peixe cartilaginoso
496	Peixe espada
497	Peixe frade
498	Peixe galo
499	Peixe lua
500	Peixe pedra
501	Peixe pena
502	Peixe piloto
503	Peixe porco
504	Peixe prego
505	Peixe rape
506	Peixe rato
507	Peixe rei
508	Peixe sapo
509	Peixe serra
510	Peixe tábua
511	Peixe voador
512	Peixes agrupados
513	Peixes não identificados
514	Pena
515	Pepino do mar
516	Peroá
517	Peroá cação
518	Peroá chinelo
519	Peroá preta
520	Perumbeba
521	Pescada
522	Pescada (branca, verdadeira)
523	Pescada amarela
524	Pescada amarela (selvagem)
525	Pescada banana
526	Pescada bicuda
527	Pescada branca
528	Pescada bucu
529	Pescada cambucu
530	Pescada cambuçu
531	Pescada curuca
532	Pescada curvina
533	Pescada dentão
534	Pescada do Piauí
535	Pescada escamuda
536	Pescada foguete
537	Pescada gó
538	Pescada goiva
539	Pescada maria mole
540	Pescada olhuda
541	Pescada perna de moça
542	Pescada real
543	Pescada ticupa
544	Pescada verdadeira
545	Pescada vermelha
546	Pescadinha
547	Pescadinha (aratã, sete buchos)
548	Pescadinha gó
549	Pescadinha mole
550	Pescadinha real
551	Pijirica
552	Pilombeta
553	Pirá
554	Pirajica
555	Pirambeba
556	Pirambeju
557	Pirambu
558	Piranema
559	Piranjica
560	Pirapema
561	Pirapiranga
562	Pirapiranzo
563	Piraúna
564	Pirucaia
565	Pititinga
566	Pitiú
567	Pitu
568	Polvo
569	Polvo saquinho
570	Pontudo
571	Porco
572	Porco chinelo
573	Porco peludo
574	Pratibu
575	Pratiqueira
576	Prego
577	Pregoaí
578	Prejereba
579	Quelônios
580	Rabo aberto
581	Rabo de fogo
582	Rabo seco
583	Raia
584	Raia bicuda
585	Raia borboleta
586	Raia branca
587	Raia carimbada
588	Raia emplastro
589	Raia emplastro castelnaui
590	Raia ferreira
591	Raia jamanta
592	Raia manteiga
593	Raia morcego
594	Raia pintada
595	Raia ticonha
596	Raia viola
597	Raposa
598	Rato
599	Realito
600	Redondo
601	Rêmora
602	Robalo
603	Robalo flecha
604	Robalo peba
605	Robalo peva
606	Rombudo
607	Roncador
608	Rosado
609	Sabão
610	Sabará
611	Saberé
612	Sabonete
613	Sagra
614	Saguá
615	Salema
616	Salmão
617	Salmonete
618	Salteira
619	Sambuio
620	Samenduara
621	Samucanga
622	Sanhoá
623	Sapateira
624	Sapateiro
625	Sapo
626	Sapuruna
627	Saquaritá
628	Saramonete
629	Saramunete
630	Sarda
631	Sarda (serra)
632	Sardinha
633	Sardinha bandeira
634	Sardinha boca torta
635	Sardinha cascadura
636	Sardinha cascuda
637	Sardinha do reino
638	Sardinha laje
639	Sardinha mole
640	Sardinha verdadeira
641	Sardinha vermelha
642	Sargentinho
643	Sargo
644	Sargo de dente
645	Sari sari
646	Sarnambi
647	Sarrão
648	Sauara
649	Saúba
650	Saúna
651	Savelha
652	Selvagem
653	Serigado
654	Sernambiguara
655	Serra
656	Serrão
657	Serrinha
658	Siri
659	Siri azul
660	Siri candeia
661	Siri de mangue
662	Siri fedido
663	Siri pintado
664	Siri vermelho
665	Sirigado
666	Sirigado (badejo)
667	Sirioba
668	Soia
669	Solteira
670	Sororoca
671	Sururu
672	Tainha
673	Tainha parati
674	Taioba
675	Tamatarana
676	Tamburutaca
677	Tapioca
678	Tararaca
679	Tarpão
680	Tartaruga
681	Tartaruga (de mar)
682	Tibiro
683	Timbira
684	Timbiro
685	Tinga
686	Tintureira
687	Tira vira
688	Tombiro
689	Tortinha
690	Trilha
691	Trombeta
692	Trombeta vermelha
693	Tubarão
694	Tubarão azul
695	Tubarão cachorro
696	Tubarão mako
697	Tubarão martelo
698	Tubarão raposa
699	Ubarana
700	Ubarana rato
701	Unha de velho
702	Uriacica
703	Uricica
704	Uritinga
705	Urubaiana
706	Vaquara
707	Vento leste
708	Vermelha
709	Vermelho
710	Vermelho henrique
711	Vieira
712	Viola
713	Viúva
714	Viúva negra
715	Viuvinha
716	Vivoca
717	Voador
718	Wahoo
719	Xangó
720	Xarelete
721	Xaréu
722	Xaréu branco
723	Xaréu preto
724	Xaveia
725	Xerelete
726	Xerne
727	Xira
728	Xixarro
729	Xixarro olho de boi
730	Zambuio
